# Supplementary material for: Identification of genes involved in the evolution of human intelligence through combination of inter-species and intra-species genetic variations
Source: PeerJ. 2020 Apr 16;8:e8912. doi: 10.7717/peerj.8912 (PMC7167246; doi:10.7717/peerj.8912)
Supplement: Table S1 [file peerj-08-8912-s001.xlsx]

## Sheet: sheet1
Supplementary Table1. 271 Lead SNPs in the reported genome-wide association studies of intelligence
SNP number	Chromosome	Position	Allele 1	Allele 2	Cohort size	P-value	MAF	Phenotype	Source
rs10457441	6	98124244	t	c	53187	3.926e-09	0.4433	General cognitive	David, 2015
rs10119	19	44903416	a	g	44018.2	5.668e-09	0.2137	General cognitive	David, 2015
rs17522122	14	32833676	t	g	53913.3	2.548e-08	0.4281	General cognitive	David, 2015
rs7296313	12	111440722	C	T	111483	1.11e-08	0.209939	Reaction Time	David, 2016
rs10931898	2	200306468	G	C	111483	2.65e-08	0.392216	Reaction Time	David, 2016
rs2142694	22	42146868	A	G	36035	7.45e-12	0.46399	Verbal-numerical Reasoning	David, 2016
14:66113725_C_A	14	65647007	A	C	36035	1.5e-08	0.00101051	Verbal-numerical Reasoning	David, 2016
rs9771228	7	32282884	C	T	36035	4.18e-08	0.357414	Verbal-numerical Reasoning	David, 2016
rs76114856	2	24807432	t	g	32777	6.582e-09	0.0402	General cognitive	Trampush,2017
rs6669072	1	90781788	t	c	35107	2.773e-08	0.3309	General cognitive	Trampush,2017
rs2490272	6	108574183	t	c	78307	9.96e-14	0.3692	Intelligence	Sniekers, 2017
rs9320913	6	98136857	a	c	78307	3.79e-11	0.5164	Intelligence	Sniekers, 2017
rs10236197	7	32252149	t	c	78286	1.03e-10	0.37	Intelligence	Sniekers, 2017
rs2251499	13	105987507	t	c	78307	2.74e-10	0.7433	Intelligence	Sniekers, 2017
rs36093924	22	42142388	t	c	54119	2.87e-10	0.5405	Intelligence	Sniekers, 2017
rs7646501	3	24037800	a	g	65866	1.79e-09	0.2589	Intelligence	Sniekers, 2017
rs4728302	7	133945710	t	c	78307	2.42e-09	0.4027	Intelligence	Sniekers, 2017
rs10191758	2	143505711	a	g	54119	3.06e-09	0.3935	Intelligence	Sniekers, 2017
rs12744310	1	41307830	t	c	65866	4.2e-09	0.7773	Intelligence	Sniekers, 2017
rs66495454	1	72282884	g	gtcct	54119	9.08e-09	0.3769	Intelligence	Sniekers, 2017
rs12928404	16	28835925	t	c	78307	1.15e-08	0.4115	Intelligence	Sniekers, 2017
rs113315451	20	49061486	a	attat	54119	1.15e-08	0.5746	Intelligence	Sniekers, 2017
rs41352752	5	88733391	t	c	54119	1.35e-08	0.03414	Intelligence	Sniekers, 2017
rs13010010	2	100236272	t	c	78308	1.56e-08	0.6218	Intelligence	Sniekers, 2017
rs16954078	17	48228765	a	t	65866	2.84e-08	0.7891	Intelligence	Sniekers, 2017
rs11138902	9	69488398	a	g	78307	4.12e-08	0.4626	Intelligence	Sniekers, 2017
rs6746731	2	71345787	t	g	78307	4.88e-08	0.5713	Intelligence	Sniekers, 2017
rs6779302	3	16818207	t	g	54119	4.99e-08	0.632	Intelligence	Sniekers, 2017
rs4962322	10	126244196	a	c	1238case–8172control	8.05e-09	0.089	Intelligence	Zabaneh, 2018
rs1727307	12	123091195	a	g	269374	3.095e-09	0.288605	Intelligence	Savage, 2018
rs17826816	5	7519185	a	g	269282	1.677e-08	0.773807	Intelligence	Savage, 2018
rs34811474	4	25407216	a	g	243818	7.148e-16	0.19789	Intelligence	Savage, 2018
rs287879	6	156822205	a	g	268781	8.469e-10	0.730782	Intelligence	Savage, 2018
rs4660749	1	43784630	t	g	268257	8.724e-11	0.105405	Intelligence	Savage, 2018
rs35433030	6	26529662	a	g	265521	4.671e-08	0.0827379	Intelligence	Savage, 2018
rs66954617	17	58922066	a	g	265761	1.722e-13	0.374438	Intelligence	Savage, 2018
rs36033	5	61664900	t	c	264416	1.017e-08	0.581983	Intelligence	Savage, 2018
rs199928	1	181771065	t	c	264195	3.149e-08	0.174577	Intelligence	Savage, 2018
rs5750853	22	39580181	t	c	257674	2.604e-10	0.420018	Intelligence	Savage, 2018
rs1043595	7	128769958	a	g	265680	1.269e-09	0.261241	Intelligence	Savage, 2018
rs10917152	1	22099149	t	c	267975	2.227e-09	0.130936	Intelligence	Savage, 2018
rs12446238	16	62041234	a	g	267736	4.804e-09	0.458516	Intelligence	Savage, 2018
rs75973558	5	26880816	a	g	245527	9.417e-09	0.884555	Intelligence	Savage, 2018
rs6456379	6	20893016	a	c	264549	4.202e-09	0.424638	Intelligence	Savage, 2018
rs7546297	1	31640893	a	g	267708	1.332e-12	0.378426	Intelligence	Savage, 2018
rs78084033	20	35632068	a	c	262111	1.617e-08	0.86563	Intelligence	Savage, 2018
rs12035012	1	41284976	a	c	268142	3.675e-16	0.217016	Intelligence	Savage, 2018
rs2721173	8	144519045	t	c	267693	2.887e-09	0.489637	Intelligence	Savage, 2018
rs11932971	4	17822279	t	c	264999	5.462e-13	0.846504	Intelligence	Savage, 2018
rs1007934	14	72996771	a	g	269586	1.004e-08	0.379905	Intelligence	Savage, 2018
rs6860963	5	169812704	t	c	268942	5.569e-09	0.189898	Intelligence	Savage, 2018
rs913264	9	129181859	t	c	267060	7.085e-11	0.286634	Intelligence	Savage, 2018
rs11804556	1	98032885	a	g	258490	5.237e-10	0.0691561	Intelligence	Savage, 2018
rs9888986	16	68263325	a	g	267786	3.517e-08	0.116292	Intelligence	Savage, 2018
rs4821995	22	41065832	a	g	267995	2.616e-08	0.344118	Intelligence	Savage, 2018
rs3749034	2	170816965	a	g	266071	6.735e-09	0.217632	Intelligence	Savage, 2018
rs1408579	10	100152437	t	c	267937	5.23e-09	0.445704	Intelligence	Savage, 2018
rs10779271	1	216659647	a	g	269057	2.173e-08	0.681229	Intelligence	Savage, 2018
rs17106817	14	69250240	t	c	263620	2.255e-08	0.706668	Intelligence	Savage, 2018
rs2508713	11	95814763	a	t	268362	5.916e-09	0.361565	Intelligence	Savage, 2018
rs4636447	1	41369961	a	g	264438	3.524e-10	0.606375	Intelligence	Savage, 2018
rs112780312	1	153824539	a	g	256189	3.662e-09	0.283508	Intelligence	Savage, 2018
rs4793161	17	44841641	a	g	265288	4.969e-08	0.232461	Intelligence	Savage, 2018
rs1540293	3	50426504	t	c	264755	2.46e-09	0.0973514	Intelligence	Savage, 2018
rs7172979	15	51525001	t	g	260362	2.47e-11	0.0238374	Intelligence	Savage, 2018
rs35608616	10	123670033	a	g	261906	7.329e-10	0.33052	Intelligence	Savage, 2018
rs7116046	11	105957182	t	c	265132	3.267e-08	0.371189	Intelligence	Savage, 2018
rs1972860	4	93658489	a	g	267176	2.091e-09	0.320835	Intelligence	Savage, 2018
rs2450333	5	177472545	a	g	255271	1.731e-11	0.49498	Intelligence	Savage, 2018
rs3860537	3	108384586	t	c	260387	2.994e-08	0.209994	Intelligence	Savage, 2018
rs72739469	15	65445742	t	c	244196	1.181e-09	0.931075	Intelligence	Savage, 2018
rs11079849	17	49013423	t	c	265226	2.26e-08	0.313397	Intelligence	Savage, 2018
rs75322822	15	41064241	a	g	244860	2.238e-08	0.0201725	Intelligence	Savage, 2018
rs3106666	2	154691341	a	g	267171	2.419e-09	0.411241	Intelligence	Savage, 2018
rs12470949	2	23711946	t	c	269277	1.323e-08	0.284247	Intelligence	Savage, 2018
rs12535854	7	105422925	c	g	256877	6.732e-10	0.336233	Intelligence	Savage, 2018
rs2955280	2	43889697	t	c	268351	4.9e-08	0.527964	Intelligence	Savage, 2018
rs7941785	11	64093845	a	g	265984	4.753e-08	0.36911	Intelligence	Savage, 2018
rs2072490	19	18146940	t	c	265518	5.93e-10	0.509332	Intelligence	Savage, 2018
rs9516855	13	97195738	a	g	266748	4.193e-08	0.946735	Intelligence	Savage, 2018
rs7196032	16	70722163	t	c	262419	4.467e-08	0.432569	Intelligence	Savage, 2018
rs11605348	11	47584931	a	g	264878	9.728e-09	0.342131	Intelligence	Savage, 2018
rs1144593	1	109488323	a	g	268132	1.572e-10	0.702602	Intelligence	Savage, 2018
rs1280049	6	75826616	a	c	269184	3.919e-08	0.475485	Intelligence	Savage, 2018
rs2678210	1	201818812	t	c	263842	6.97e-10	0.714044	Intelligence	Savage, 2018
rs2885208	11	113094434	t	c	268192	4.579e-08	0.807669	Intelligence	Savage, 2018
rs10411958	19	13002827	t	c	263621	2.712e-09	0.471558	Intelligence	Savage, 2018
rs889169	19	47045420	a	g	249200	2.751e-08	0.600693	Intelligence	Savage, 2018
rs7557525	2	51023367	t	c	267746	4.039e-08	0.668017	Intelligence	Savage, 2018
rs1369429	15	87887703	t	c	262697	1.146e-09	0.347906	Intelligence	Savage, 2018
rs5753383	22	30908214	a	g	269175	4.998e-08	0.321173	Intelligence	Savage, 2018
rs76160968	5	103346444	a	g	260645	8.839e-09	0.962088	Intelligence	Savage, 2018
rs144026674	19	39093340	t	c	247977	3.19e-08	0.0375577	Intelligence	Savage, 2018
rs3843954	13	57974377	c	g	224842	5.305e-10	0.274161	Intelligence	Savage, 2018
rs778591	5	140645899	a	g	269286	2.078e-10	0.428919	Intelligence	Savage, 2018
rs12646225	4	703059	t	c	266694	2.505e-09	0.119864	Intelligence	Savage, 2018
rs34426618	5	60301660	t	c	264140	2.161e-08	0.185448	Intelligence	Savage, 2018
rs11634187	15	40430582	t	g	264197	1.118e-08	0.850447	Intelligence	Savage, 2018
rs73139272	3	16816965	t	g	264744	9.235e-10	0.132199	Intelligence	Savage, 2018
rs13157057	5	58361930	t	g	265452	2.033e-08	0.239991	Intelligence	Savage, 2018
rs7921305	10	131961692	a	g	263119	1.769e-08	0.23956	Intelligence	Savage, 2018
rs971681	14	29605481	t	c	268267	2.435e-09	0.383539	Intelligence	Savage, 2018
rs62266110	3	93819079	a	g	261661	1.319e-08	0.286772	Intelligence	Savage, 2018
rs11646221	16	7616086	t	g	263669	1.567e-10	0.55636	Intelligence	Savage, 2018
rs55754731	12	15379957	t	c	264037	6.062e-09	0.831337	Intelligence	Savage, 2018
rs7573001	2	198065172	c	g	259519	1.324e-08	0.379905	Intelligence	Savage, 2018
rs146865992	12	48991916	t	c	259815	7.508e-09	0.0292886	Intelligence	Savage, 2018
rs2111490	8	103549495	a	g	265184	1.833e-08	0.464706	Intelligence	Savage, 2018
rs2295499	4	2715963	t	c	268334	2.591e-09	0.434878	Intelligence	Savage, 2018
rs4725065	7	8069892	a	g	267463	1.518e-09	0.518032	Intelligence	Savage, 2018
rs2920940	8	92168737	t	c	266393	2.759e-14	0.23069	Intelligence	Savage, 2018
rs76608582	19	4474728	a	c	232539	2.546e-08	0.0389282	Intelligence	Savage, 2018
rs62131236	2	44944407	t	c	260966	4.798e-08	0.219772	Intelligence	Savage, 2018
rs9503599	6	3450814	t	c	261955	8.047e-10	0.562766	Intelligence	Savage, 2018
rs1057687	9	96490182	a	g	268085	2.02e-08	0.810071	Intelligence	Savage, 2018
rs3896224	10	104708095	a	g	263381	3.294e-08	0.554358	Intelligence	Savage, 2018
rs80170948	5	64724489	t	g	246519	7.686e-10	0.961241	Intelligence	Savage, 2018
rs4459994	4	97171156	a	c	265874	1.711e-08	0.223822	Intelligence	Savage, 2018
rs6539284	12	79198900	t	c	263597	5.563e-12	0.612997	Intelligence	Savage, 2018
rs10804681	3	141941833	a	t	266196	2.938e-08	0.153973	Intelligence	Savage, 2018
rs2558096	2	136774260	t	g	266795	1.737e-08	0.419957	Intelligence	Savage, 2018
rs7248006	19	31438274	t	c	264719	1.054e-11	0.387866	Intelligence	Savage, 2018
rs13421971	2	165855094	a	t	265142	1.878e-09	0.342886	Intelligence	Savage, 2018
rs6840804	4	146848060	a	g	268536	2.248e-08	0.695996	Intelligence	Savage, 2018
rs41293013	1	83951902	t	c	232807	2.183e-10	0.992501	Intelligence	Savage, 2018
rs34320898	1	171789999	c	g	225644	2.696e-09	0.183646	Intelligence	Savage, 2018
rs17128425	11	124112642	a	t	267721	1.865e-08	0.100539	Intelligence	Savage, 2018
rs17698176	17	46742229	t	g	247702	1.702e-08	0.802202	Intelligence	Savage, 2018
rs10954779	8	31162081	t	c	265561	3.038e-09	0.556452	Intelligence	Savage, 2018
rs10196283	2	179850608	a	c	265483	3.637e-08	0.841731	Intelligence	Savage, 2018
rs73068339	19	58578896	c	g	265789	5.955e-10	0.282707	Intelligence	Savage, 2018
rs2285640	17	#N/A	a	g	263690	2.376e-10	0.544102	Intelligence	Savage, 2018
rs71413877	2	100308360	a	g	248675	3.406e-10	0.0355251	Intelligence	Savage, 2018
rs2008514	16	28814284	a	g	269455	1.246e-24	0.38474	Intelligence	Savage, 2018
rs8051038	16	71836797	a	g	269045	1.783e-09	0.749415	Intelligence	Savage, 2018
rs11972637	7	70511251	a	g	266766	6.346e-09	0.0741608	Intelligence	Savage, 2018
rs13107325	4	102267552	t	c	265961	2.233e-21	0.065445	Intelligence	Savage, 2018
rs10189857	2	60486100	a	g	268710	4.907e-12	0.562889	Intelligence	Savage, 2018
rs59142272	3	139989899	a	g	261961	7.319e-10	0.169156	Intelligence	Savage, 2018
rs2268894	2	161999638	t	c	267027	3.982e-14	0.546889	Intelligence	Savage, 2018
rs8025964	15	82229429	a	g	265960	5.777e-10	0.465383	Intelligence	Savage, 2018
rs702222	9	23805571	t	c	264469	5.019e-12	0.355682	Intelligence	Savage, 2018
rs7652296	3	89538112	a	g	268118	3.509e-09	0.609824	Intelligence	Savage, 2018
rs1438660	5	109722893	a	t	268458	3.521e-08	0.656837	Intelligence	Savage, 2018
rs6550835	3	24021170	a	g	265082	2.439e-17	0.326347	Intelligence	Savage, 2018
rs2393967	10	63373396	a	c	266989	2.695e-10	0.691484	Intelligence	Savage, 2018
rs73078367	3	48670914	t	c	259070	1.807e-09	0.115029	Intelligence	Savage, 2018
rs12772375	10	102322931	t	g	258345	1.677e-10	0.424115	Intelligence	Savage, 2018
rs3823036	6	98836656	t	c	268191	9.114e-11	0.681029	Intelligence	Savage, 2018
rs9853960	3	136769147	a	g	265895	1.956e-09	0.32858	Intelligence	Savage, 2018
rs35731967	2	199508538	t	c	252991	2.379e-09	0.819864	Intelligence	Savage, 2018
rs13253386	8	14144511	t	g	266502	2.372e-13	0.54033	Intelligence	Savage, 2018
rs276626	16	13062792	a	g	261023	4.844e-08	0.812411	Intelligence	Savage, 2018
rs2576835	2	64079850	a	g	266187	1.4e-09	0.240715	Intelligence	Savage, 2018
rs4687625	3	52529702	t	c	268226	1.918e-12	0.444041	Intelligence	Savage, 2018
rs4731365	7	127442443	a	g	268897	5.867e-12	0.393086	Intelligence	Savage, 2018
rs2842188	1	43548609	t	c	268324	9.337e-09	0.351956	Intelligence	Savage, 2018
rs1831539	1	59094665	t	c	264014	4.722e-10	0.542809	Intelligence	Savage, 2018
rs2420551	1	68973094	a	t	264461	4.604e-11	0.887065	Intelligence	Savage, 2018
rs12128707	1	72122436	a	g	257955	4.247e-18	0.740591	Intelligence	Savage, 2018
rs3128341	1	72284165	t	c	269451	1.632e-20	0.198075	Intelligence	Savage, 2018
rs6668048	1	95734101	t	c	268318	4.24e-15	0.471851	Intelligence	Savage, 2018
rs1473474	1	98123329	t	c	267657	1.327e-08	0.472328	Intelligence	Savage, 2018
rs1528204	1	103191022	t	c	269361	5.467e-11	0.594195	Intelligence	Savage, 2018
rs967569	2	41389206	t	c	265548	8.213e-10	0.674007	Intelligence	Savage, 2018
rs58593843	2	60272328	a	g	263810	2.666e-09	0.0969818	Intelligence	Savage, 2018
rs4852252	2	71312171	t	c	267580	3.835e-14	0.45	Intelligence	Savage, 2018
rs11898362	2	73338165	a	g	261477	2.254e-09	0.303372	Intelligence	Savage, 2018
rs11678106	2	82216983	t	c	265394	4.618e-09	0.497074	Intelligence	Savage, 2018
rs2309812	2	100253240	t	c	268685	9.954e-16	0.358192	Intelligence	Savage, 2018
rs60262711	2	116890244	t	c	264536	1.652e-08	0.384878	Intelligence	Savage, 2018
rs10189912	2	143405040	a	g	268761	1.219e-11	0.646474	Intelligence	Savage, 2018
rs17244416	2	156060314	c	g	268628	3.447e-09	0.107884	Intelligence	Savage, 2018
rs6436555	2	156631765	a	c	265291	3.985e-12	0.508023	Intelligence	Savage, 2018
rs10192369	2	160524377	a	g	265751	4.906e-09	0.512673	Intelligence	Savage, 2018
rs17221725	2	160904409	t	c	267293	1.186e-08	0.0864644	Intelligence	Savage, 2018
rs3754970	2	161235325	t	c	262251	2.623e-13	0.527518	Intelligence	Savage, 2018
rs3956504	2	163118956	a	c	266768	4.474e-09	0.720865	Intelligence	Savage, 2018
rs62181012	2	180129744	t	c	261314	1.727e-09	0.807961	Intelligence	Savage, 2018
rs62198803	2	185343653	a	g	266194	3.4e-09	0.236434	Intelligence	Savage, 2018
rs1455344	2	198651335	a	g	264042	5.197e-09	0.444164	Intelligence	Savage, 2018
rs13024268	2	231618807	a	g	254536	7.147e-09	0.385833	Intelligence	Savage, 2018
rs1589652	3	35496960	a	g	266070	5.823e-10	0.443301	Intelligence	Savage, 2018
rs13096357	3	48638423	a	c	264609	4.523e-08	0.114444	Intelligence	Savage, 2018
rs2352974	3	49853180	t	c	265625	3.691e-29	0.461626	Intelligence	Savage, 2018
rs4485754	3	54200695	a	g	268720	1.585e-08	0.788497	Intelligence	Savage, 2018
rs11720523	3	71496019	a	c	268784	3.889e-11	0.409655	Intelligence	Savage, 2018
rs6770622	3	85122265	a	g	265221	5.761e-11	0.0417462	Intelligence	Savage, 2018
rs13071190	3	137403552	t	c	264545	5.551e-10	0.667123	Intelligence	Savage, 2018
rs4484297	4	16330759	c	g	266417	7.451e-09	0.25077	Intelligence	Savage, 2018
rs144246	4	17258285	a	g	266008	4.908e-08	0.369818	Intelligence	Savage, 2018
rs67482514	4	64919730	c	g	259981	3.207e-08	0.75616	Intelligence	Savage, 2018
rs6819372	4	67104383	a	g	268631	4.017e-13	0.492609	Intelligence	Savage, 2018
rs62327949	4	102295625	a	g	256360	3.241e-08	0.655266	Intelligence	Savage, 2018
rs2726491	4	105291405	a	g	269092	4.168e-23	0.350416	Intelligence	Savage, 2018
rs6535809	4	151671781	a	g	267680	6.649e-13	0.513351	Intelligence	Savage, 2018
rs1840847	5	13100063	a	g	264327	1.44e-08	0.350354	Intelligence	Savage, 2018
rs1812587	5	63695975	t	g	261560	3.681e-10	0.482507	Intelligence	Savage, 2018
rs34316	5	88719728	a	c	265617	2.818e-14	0.434694	Intelligence	Savage, 2018
rs166820	5	90057393	a	g	269027	1.369e-11	0.173576	Intelligence	Savage, 2018
rs4308464	5	93133161	c	g	261975	1.217e-10	0.375177	Intelligence	Savage, 2018
rs12187824	5	108443541	a	c	265904	2.426e-08	0.485171	Intelligence	Savage, 2018
rs1145123	5	111690901	t	c	260587	1.198e-13	0.516307	Intelligence	Savage, 2018
rs1991228	5	114627866	c	g	259795	2.343e-08	0.296751	Intelligence	Savage, 2018
rs4463213	5	140166163	a	g	268325	3.004e-12	0.520681	Intelligence	Savage, 2018
rs31768	5	166071274	a	t	262143	2.646e-09	0.286649	Intelligence	Savage, 2018
rs13184816	5	171693022	a	c	250771	9.663e-09	0.261919	Intelligence	Savage, 2018
rs566237	6	11543109	a	g	268091	1.817e-10	0.683261	Intelligence	Savage, 2018
rs6459098	6	13775675	t	c	264267	3.674e-08	0.326548	Intelligence	Savage, 2018
rs6903716	6	21956173	a	g	268979	2.387e-09	0.700015	Intelligence	Savage, 2018
rs1233578	6	28744470	a	g	255604	1.075e-09	0.848676	Intelligence	Savage, 2018
rs77418166	6	97756622	t	c	244942	1.058e-08	0.0922544	Intelligence	Savage, 2018
rs6928545	6	97890027	a	g	264460	7.529e-12	0.681337	Intelligence	Savage, 2018
rs1906252	6	98102413	a	c	267212	7.477e-31	0.465953	Intelligence	Savage, 2018
rs9384679	6	108543216	t	c	269078	7.936e-22	0.398784	Intelligence	Savage, 2018
rs13212044	6	126704516	t	g	268153	1.464e-08	0.230567	Intelligence	Savage, 2018
rs115064	7	24137572	t	c	265957	1.065e-08	0.612319	Intelligence	Savage, 2018
rs1580019	7	32453557	a	t	269162	1.586e-08	0.659701	Intelligence	Savage, 2018
rs799444	7	44729591	t	c	265222	2.481e-11	0.450816	Intelligence	Savage, 2018
rs2030705	7	70248480	a	t	268435	3.448e-08	0.782707	Intelligence	Savage, 2018
rs13223152	7	70483255	a	g	266940	2.335e-10	0.591423	Intelligence	Savage, 2018
rs56150095	7	72294084	a	c	266047	1.275e-15	0.531876	Intelligence	Savage, 2018
rs4731368	7	127540613	a	g	264323	2.189e-08	0.212596	Intelligence	Savage, 2018
rs4731392	7	128048098	a	g	265178	2.687e-13	0.692208	Intelligence	Savage, 2018
rs1362739	7	133746181	a	c	268624	1.825e-14	0.468787	Intelligence	Savage, 2018
rs1473634	8	21057805	a	g	267232	1.252e-09	0.697706	Intelligence	Savage, 2018
rs13276212	8	65528358	t	g	263852	4.478e-08	0.482784	Intelligence	Savage, 2018
rs1106761	8	141609134	a	g	256774	9.115e-10	0.364644	Intelligence	Savage, 2018
rs7015050	8	142019599	a	t	265823	3.975e-08	0.69883	Intelligence	Savage, 2018
rs4976976	8	142230292	a	g	266185	4.528e-10	0.419172	Intelligence	Savage, 2018
rs11793831	9	23362313	t	g	263167	3.252e-23	0.40773	Intelligence	Savage, 2018
rs11999669	9	23379448	a	t	262041	1.774e-08	0.873221	Intelligence	Savage, 2018
rs28620532	9	95454594	a	g	261069	1.511e-08	0.64364	Intelligence	Savage, 2018
rs2987390	9	131835214	c	g	262158	1.192e-08	0.733323	Intelligence	Savage, 2018
rs7069887	10	29280343	a	c	261247	7.442e-09	0.852171	Intelligence	Savage, 2018
rs1891273	10	91682622	t	c	257697	3.168e-08	0.48879	Intelligence	Savage, 2018
rs3740422	10	101806203	c	g	268246	1.253e-16	0.326286	Intelligence	Savage, 2018
rs2373353	11	79451578	a	g	259547	1.556e-08	0.637173	Intelligence	Savage, 2018
rs329672	11	133929237	t	c	262794	1.003e-09	0.627764	Intelligence	Savage, 2018
rs1054442	12	48995537	a	c	267489	2.518e-14	0.619957	Intelligence	Savage, 2018
rs1962047	12	57898924	a	g	264057	8.891e-12	0.36218	Intelligence	Savage, 2018
rs7312919	12	92567129	c	g	263162	4.828e-10	0.662565	Intelligence	Savage, 2018
rs9569206	13	55129083	a	g	268498	4.845e-08	0.628765	Intelligence	Savage, 2018
rs17514375	13	105941043	t	c	268366	3.578e-08	0.831691	Intelligence	Savage, 2018
rs2478286	13	105986390	c	g	269582	1.635e-16	0.745704	Intelligence	Savage, 2018
rs8006700	14	26693698	a	t	267288	4.964e-10	0.679412	Intelligence	Savage, 2018
rs176217	14	29131153	t	c	267272	5.641e-11	0.863951	Intelligence	Savage, 2018
rs2239647	14	32823537	a	c	264189	1.136e-13	0.447783	Intelligence	Savage, 2018
rs11622558	14	36532930	t	c	263905	5.659e-10	0.388482	Intelligence	Savage, 2018
rs35760956	14	40664963	a	g	261431	2.354e-12	0.600601	Intelligence	Savage, 2018
rs17698580	14	98080574	t	c	268656	2.087e-09	0.756175	Intelligence	Savage, 2018
rs2071407	14	103520803	t	c	264658	1.519e-14	0.362458	Intelligence	Savage, 2018
rs55881236	15	46348758	t	c	258718	3.482e-08	0.549461	Intelligence	Savage, 2018
rs11076962	16	5761366	t	c	266051	2.574e-08	0.716554	Intelligence	Savage, 2018
rs72774059	16	10007295	a	c	265137	3.41e-09	0.099384	Intelligence	Savage, 2018
rs2457192	16	12103584	a	c	254769	2.835e-10	0.723268	Intelligence	Savage, 2018
rs62029752	16	12933084	a	g	261996	4.676e-10	0.739852	Intelligence	Savage, 2018
rs4781499	16	13537087	a	g	266467	1.975e-09	0.847659	Intelligence	Savage, 2018
rs9788857	16	13820927	a	c	260868	7.032e-09	0.805205	Intelligence	Savage, 2018
rs34172651	16	24755520	t	c	261458	1.063e-12	0.679073	Intelligence	Savage, 2018
rs2647995	16	51543285	t	c	259642	8.683e-11	0.70542	Intelligence	Savage, 2018
rs8054299	16	53464743	c	g	269270	3.841e-15	0.682476	Intelligence	Savage, 2018
rs16951547	17	52508538	t	g	267331	5.306e-10	0.735325	Intelligence	Savage, 2018
rs71367283	18	52525714	a	c	239410	1.554e-10	0.971912	Intelligence	Savage, 2018
rs6508220	18	53304806	a	g	266839	9.561e-17	0.503218	Intelligence	Savage, 2018
rs17002025	19	12419363	a	g	256305	1.888e-09	0.12239	Intelligence	Savage, 2018
rs6019535	20	48924980	a	g	266115	3.284e-17	0.305297	Intelligence	Savage, 2018
rs2836921	21	39144144	a	g	265147	6.537e-12	0.312288	Intelligence	Savage, 2018
rs4396807	22	37742372	c	g	265773	3.582e-08	0.361272	Intelligence	Savage, 2018
rs5750830	22	39444823	a	c	266749	2.459e-13	0.741484	Intelligence	Savage, 2018
rs62236533	22	41596165	a	g	251864	1.204e-12	0.0878349	Intelligence	Savage, 2018
