# Supplementary material for: Identification of genes involved in the evolution of human intelligence through combination of inter-species and intra-species genetic variations
Source: PeerJ. 2020 Apr 16;8:e8912. doi: 10.7717/peerj.8912 (PMC7167246; doi:10.7717/peerj.8912)
Supplement: Table S2 [file peerj-08-8912-s002.xlsx]

## Sheet: Sheet1
Supplementary Table2. list of the 549 Bait Genes
Gene	Chromsome	Star	End	Positional associated SNP	Phenotype	Reference
TOMM40	19	44890569	44903689	rs10119	General cognitive	David, 2015
AKAP6	14	32329273	32837681	rs17522122;rs2239647	General cognitive	David, 2015; Savage, 2018
ATXN2	12	111443485	111599676	rs7296313	Reaction-time	David, 2016
SH2B3	12	111405948	111451623	rs7296313	Reaction-time	David, 2016
SPATS2L	2	200305881	200482263	rs10931898	Reaction-time	David, 2016
CYP2D6	22	42126499	42130906	rs2142694;rs28579115	Verbal-numerical Reasoning; Intelligence	David, 2016; Sniekers, 2017
CYP2D7	22	42140203	42144577	rs2142694;rs36093924	Verbal-numerical Reasoning; Intelligence	David, 2016; Sniekers, 2017
FUT8	14	65410592	65744121	14:66113725_C_A	Verbal-numerical Reasoning	David, 2016
NAGA	22	42058354	42070842	rs2142694;rs36093924;rs62236533	Verbal-numerical Reasoning; Intelligence	David, 2016; Sniekers, 2017; Savage, 2018
NDUFA6	22	42085525	42090955	rs2142694;rs36093924;rs62236533	Verbal-numerical Reasoning; Intelligence	David, 2016; Sniekers, 2017; Savage, 2018
NDUFA6-AS1	22	42090931	42137742	rs2142694	Verbal-numerical Reasoning	David, 2016
PDE1C	7	31751179	32299329	rs9771228; rs10236197	Verbal-numerical Reasoning; Intelligence	David, 2016; Sniekers, 2017
SMDT1	22	42079691	42084284	rs2142694	Verbal-numerical Reasoning	David, 2016
SREBF2	22	41833079	41907308	rs2142694;rs62236533	Verbal-numerical Reasoning	David, 2016; Savage, 2018
TCF20	22	42160013	42343616	rs2142694;rs36093924;rs62236533	Verbal-numerical Reasoning; Intelligence	David, 2016; Sniekers, 2017; Savage, 2018
WBP2NL	22	41998725	42058456	rs2142694;rs36093924;rs62236533	Verbal-numerical Reasoning; Intelligence	David, 2016; Sniekers, 2017; Savage, 2018
CENPO	2	24793136	24822376	rs76114856	General cognitive	Trampush, 2017
LOC105378853	1	90829547	90836161	rs6669072	General cognitive	Trampush, 2017
SEPT3	22	41969475	41998221	rs62236533;rs36093924	Intelligence	Sniekers, 2017; Savage, 2018
AFF3	2	99545419	100142739	rs71413877;rs13010010	Intelligence	Sniekers, 2017; Savage, 2018
APBA1	9	69427530	69672306	rs11138902	Intelligence	Sniekers, 2017
ARHGAP15	2	143091362	143768352	rs10189912;rs10191758	Intelligence	Sniekers, 2017; Savage, 2018
ATP2A1	16	28878405	28904509	rs2008514;rs12928404	Intelligence	Sniekers, 2017; Savage, 2018
ATP2A1-AS1	16	28878957	28879920	rs12928404	Intelligence	Sniekers, 2017
ATXN2L	16	28823035	28837237	rs2008514;rs12928404	Intelligence	Sniekers, 2017; Savage, 2018
CSE1L	20	49046246	49096960	rs6019535;rs113315451	Intelligence	Sniekers, 2017; Savage, 2018
DAZL	3	16586792	16670306	rs6779302	Intelligence	Sniekers, 2017
EXOC4	7	133253073	134066589	rs1362739;rs4728302	Intelligence	Sniekers, 2017; Savage, 2018
PHETA2	22	42074251	42079441	rs36093924	Intelligence	Sniekers, 2017
FOXO3	6	108559835	108684774	rs9384679;rs2490272	Intelligence	Sniekers, 2017; Savage, 2018
FOXO6	1	41361922	41383590	rs4636447;rs12744310	Intelligence	Sniekers, 2017; Savage, 2018
AFG1L	6	108294894	108526796	rs2490272	Intelligence	Sniekers, 2017
LINC00343	13	105704280	105764440	rs2251499	Intelligence	Sniekers, 2017
LINC00460	13	106374477	106384315	rs2251499	Intelligence	Sniekers, 2017
LINC00634	22	41952165	41958933	rs36093924	Intelligence	Sniekers, 2017
LINC00691	3	24096269	24103238	rs7646501	Intelligence	Sniekers, 2017
LINC01104	2	100208254	100251484	rs2309812;rs13010010	Intelligence	Sniekers, 2017; Savage, 2018
LONRF2	2	100273291	100322733	rs71413877;rs13010010	Intelligence	Sniekers, 2017; Savage, 2018
MEF2C	5	88717117	88904257	rs34316;rs41352752	Intelligence	Sniekers, 2017; Savage, 2018
MIR2113	6	98024531	98024621	rs9320913	Intelligence	Sniekers, 2017
NDUFA6-DT	22	42090933	42137742	rs36093924	Intelligence	Sniekers, 2017
NEGR1	1	71395940	72282734	rs12128707;rs66495454	Intelligence	Sniekers, 2017; Savage, 2018
NPIPB9	16	28751787	28772807	rs12928404	Intelligence	Sniekers, 2017
NR1D2	3	23945260	23980618	rs6550835;rs7646501	Intelligence	Sniekers, 2017; Savage, 2018
PLCL2	3	16802651	17090594	rs73139272;rs6779302	Intelligence	Sniekers, 2017; Savage, 2018
POU3F2	6	98834592	98839470	rs3823036;rs9320913	Intelligence	Sniekers, 2017; Savage, 2018
SCMH1	1	41027200	41242154	rs12025777;rs12744310	Intelligence	Sniekers, 2017; Savage, 2018
SH2B1	16	28846600	28874212	rs2008514;rs12928404	Intelligence	Sniekers, 2017; Savage, 2018
SKAP1	17	48133440	48430275	rs12928404	Intelligence	Sniekers, 2017
TUFM	16	28842411	28846408	rs2008514;rs12928404	Intelligence	Sniekers, 2017; Savage, 2018
ZNF638	2	71276561	71435069	rs4852252;rs6746731	Intelligence	Sniekers, 2017; Savage, 2018
ADAM12	10	126012381	126388455	rs4962322	Intelligence	Zabaneh, 2018
CDC42	1	22052627	22092946	rs10917152	Intelligence	Savage, 2018
WNT4	1	22117305	22143969	rs10917152	Intelligence	Savage, 2018
HCRTR1	1	31617686	31632518	rs7546297	Intelligence	Savage, 2018
PEF1	1	31629862	31644896	rs7546297	Intelligence	Savage, 2018
COL16A1	1	31652247	31704319	rs7546297	Intelligence	Savage, 2018
CTPS1	1	40979335	41012565	rs12025777	Intelligence	Savage, 2018
PTPRF	1	43525187	43623666	rs2842188	Intelligence	Savage, 2018
KDM4A	1	43650158	43705515	rs2842188	Intelligence	Savage, 2018
ST3GAL3	1	43705824	43931165	rs2842188;rs4660749	Intelligence	Savage, 2018
ARTN	1	43933320	43937241	rs2842188;rs4660749	Intelligence	Savage, 2018
IPO13	1	43946939	43968022	rs2842188;rs4660749	Intelligence	Savage, 2018
ATP6V0B	1	43974487	43978295	rs2842188;rs4660749	Intelligence	Savage, 2018
B4GALT2	1	43978943	43991170	rs4660749	Intelligence	Savage, 2018
TTLL7	1	83865028	83999150	rs41293013	Intelligence	Savage, 2018
DPYD	1	97077743	97995000	rs11804556;rs1473474	Intelligence	Savage, 2018
COL11A1	1	102876467	103108872	rs1528204	Intelligence	Savage, 2018
MYBPHL	1	109292365	109307041	rs1144593	Intelligence	Savage, 2018
SORT1	1	109309568	109397951	rs1144593	Intelligence	Savage, 2018
PSMA5	1	109399031	109426427	rs1144593	Intelligence	Savage, 2018
SYPL2	1	109466628	109482137	rs1144593	Intelligence	Savage, 2018
ATXN7L2	1	109483479	109492804	rs1144593	Intelligence	Savage, 2018
CYB561D1	1	109494052	109502932	rs1144593	Intelligence	Savage, 2018
AMIGO1	1	109504175	109509738	rs1144593	Intelligence	Savage, 2018
GATAD2B	1	153789030	153923360	rs112780312	Intelligence	Savage, 2018
DENND4B	1	153929501	153946696	rs112780312	Intelligence	Savage, 2018
CRTC2	1	153947669	153958625	rs112780312	Intelligence	Savage, 2018
SLC39A1	1	153959099	153968184	rs112780312	Intelligence	Savage, 2018
CREB3L4	1	153967534	153974363	rs112780312	Intelligence	Savage, 2018
JTB	1	153974269	153977688	rs112780312	Intelligence	Savage, 2018
NUP210L	1	153992685	154155116	rs112780312	Intelligence	Savage, 2018
VAMP4	1	171700160	171742247	rs34320898	Intelligence	Savage, 2018
METTL13	1	171781664	171814023	rs34320898	Intelligence	Savage, 2018
CACNA1E	1	181317690	181808084	rs199928	Intelligence	Savage, 2018
NAV1	1	201622885	201826969	rs2678210	Intelligence	Savage, 2018
IPO9	1	201829141	201884294	rs2678210	Intelligence	Savage, 2018
SHISA4	1	201888680	201892306	rs2678210	Intelligence	Savage, 2018
LMOD1	1	201896452	201946588	rs2678210	Intelligence	Savage, 2018
ESRRG	1	216503246	217137755	rs10779271	Intelligence	Savage, 2018
KLHL29	2	23385217	23708611	rs12470949	Intelligence	Savage, 2018
ATAD2B	2	23748664	23927114	rs12470949	Intelligence	Savage, 2018
UBXN2A	2	23927285	24004909	rs12470949	Intelligence	Savage, 2018
MFSD2B	2	24010081	24063321	rs12470949	Intelligence	Savage, 2018
LRPPRC	2	43886508	43996005	rs2955280	Intelligence	Savage, 2018
SIX3	2	44941898	44946077	rs62131236	Intelligence	Savage, 2018
NRXN1	2	49918505	51225575	rs7557525	Intelligence	Savage, 2018
BCL11A	2	60450520	60555154	rs10189857	Intelligence	Savage, 2018
WDPCP	2	63121383	63827843	rs2576835	Intelligence	Savage, 2018
UGP2	2	63840940	63891562	rs2576835	Intelligence	Savage, 2018
VPS54	2	63892146	64019072	rs2576835	Intelligence	Savage, 2018
PELI1	2	64092652	64144454	rs2576835	Intelligence	Savage, 2018	#N/A
PAIP2B	2	71182739	71227083	rs4852252	Intelligence	Savage, 2018	#N/A
DYSF	2	71453722	71686768	rs4852252	Intelligence	Savage, 2018	#N/A
ALMS1	2	73385758	73610793	rs11898362	Intelligence	Savage, 2018	rs11898362
NAT8	2	73640832	73642393	rs11898362	Intelligence	Savage, 2018	#N/A
CHST10	2	100391860	100417656	rs2309812	Intelligence	Savage, 2018	#N/A
THSD7B	2	136765545	137677717	rs2558096	Intelligence	Savage, 2018	rs2558096
KCNJ3	2	154698299	154858352	rs3106666	Intelligence	Savage, 2018	rs3106666
GPD2	2	156435290	156613735	rs6436555	Intelligence	Savage, 2018	#N/A
RBMS1	2	160272151	160493794	rs17221725;rs10192369	Intelligence	Savage, 2018	#N/A
TANK	2	161136908	161236221	rs3754970	Intelligence	Savage, 2018	#N/A
SLC4A10	2	161424332	161985282	rs2268894	Intelligence	Savage, 2018	rs2268894
DPP4	2	161992241	162074542	rs2268894	Intelligence	Savage, 2018	#N/A
TTC21B	2	165857475	165953843	rs13421971	Intelligence	Savage, 2018	rs13421971
ERICH2	2	170783786	170798971	rs3749034	Intelligence	Savage, 2018	rs3749034
GAD1	2	170813213	170861151	rs3749034	Intelligence	Savage, 2018	rs3749034
ZNF385B	2	179441982	179861505	rs10196283	Intelligence	Savage, 2018	rs10196283
RFTN2	2	197568224	197676045	rs7573001	Intelligence	Savage, 2018	rs7573001
PLCL1	2	197804702	198572581	rs7573001	Intelligence	Savage, 2018	rs7573001
SATB2	2	199269500	199471266	rs1455344;rs35731967	Intelligence	Savage, 2018	#N/A
UBE2E1	3	23805903	23891316	rs6550835	Intelligence	Savage, 2018	#N/A
NKIRAS1	3	23891660	23946591	rs6550835	Intelligence	Savage, 2018	#N/A
RPL15	3	23916545	23924374	rs6550835	Intelligence	Savage, 2018	#N/A
THRB	3	24117153	24495756	rs6550835	Intelligence	Savage, 2018	#N/A
ARPP21	3	35638945	35794496	rs1589652	Intelligence	Savage, 2018	#N/A
PFKFB4	3	48517684	48562015	rs13096357;rs73078367	Intelligence	Savage, 2018	#N/A
TMEM89	3	48620759	48621855	rs13096357;rs73078367	Intelligence	Savage, 2018	#N/A
SLC26A6	3	48625723	48635493	rs13096357;rs73078367	Intelligence	Savage, 2018	#N/A
CELSR3	3	48636469	48662915	rs13096357;rs73078367	Intelligence	Savage, 2018	#N/A	#REF!
NCKIPSD	3	48673844	48686364	rs13096357;rs73078367	Intelligence	Savage, 2018	#N/A
IP6K2	3	48688003	48740353	rs13096357;rs73078367	Intelligence	Savage, 2018	#N/A
PRKAR2A	3	48744597	48847846	rs13096357;rs73078367	Intelligence	Savage, 2018	#N/A
SLC25A20	3	48856931	48898993	rs13096357;rs2352974	Intelligence	Savage, 2018	#N/A
ARIH2	3	48918821	48986382	rs13096357;rs2352974;rs73078367	Intelligence	Savage, 2018	#N/A
P4HTM	3	48989886	49007154	rs13096357;rs2352974;rs73078367	Intelligence	Savage, 2018	#N/A
WDR6	3	49007062	49015953	rs13096357;rs2352974;rs73078367	Intelligence	Savage, 2018	#N/A
DALRD3	3	49015488	49022293	rs13096357;rs2352974;rs73078367	Intelligence	Savage, 2018	#N/A
IMPDH2	3	49024325	49029408	rs13096357;rs2352974	Intelligence	Savage, 2018	#N/A
QRICH1	3	49029707	49094363	rs13096357;rs2352974;rs73078367	Intelligence	Savage, 2018	#N/A
QARS	3	49095932	49105135	rs13096357;rs2352974;rs73078367	Intelligence	Savage, 2018	#N/A
USP19	3	49108046	49120938	rs13096357;rs2352974;rs73078367	Intelligence	Savage, 2018	#N/A
LAMB2	3	49121114	49133118	rs13096357;rs2352974;rs73078367	Intelligence	Savage, 2018	#N/A
CCDC71	3	49162535	49166321	rs13096357;rs2352974;rs73078367	Intelligence	Savage, 2018	#N/A
KLHDC8B	3	49171611	49176486	rs13096357;rs2352974;rs73078367	Intelligence	Savage, 2018	#N/A
C3orf84	3	49177632	49191858	rs13096357;rs2352974	Intelligence	Savage, 2018	#N/A
CCDC36	3	49198428	49258104	rs13096357;rs2352974;rs1540293	Intelligence	Savage, 2018	#N/A
C3orf62	3	49268602	49277909	rs13096357;rs2352974;rs1540293	Intelligence	Savage, 2018	#N/A
USP4	3	49277831	49340712	rs13096357;rs2352974;rs1540293	Intelligence	Savage, 2018	#N/A
GPX1	3	49357171	49358600	rs13096357;rs2352974;rs73078367	Intelligence	Savage, 2018	#N/A
RHOA	3	49359145	49412998	rs13096357;rs2352974;rs1540293	Intelligence	Savage, 2018	#N/A
TCTA	3	49412206	49416475	rs13096357;rs2352974;rs1540293	Intelligence	Savage, 2018	#N/A
AMT	3	49416775	49422753	rs13096357;rs2352974;rs1540293	Intelligence	Savage, 2018	#N/A
NICN1	3	49422946	49429326	rs13096357;rs2352974;rs1540293	Intelligence	Savage, 2018	#N/A
DAG1	3	49468703	49535618	rs13096357;rs2352974;rs1540293	Intelligence	Savage, 2018	#N/A
BSN	3	49554489	49671545	rs13096357;rs2352974;rs1540293	Intelligence	Savage, 2018	#N/A
APEH	3	49674002	49683963	rs13096357;rs2352974;rs1540293	Intelligence	Savage, 2018	#N/A
MST1	3	49683947	49689501	rs13096357;rs2352974;rs73078367	Intelligence	Savage, 2018	#N/A
RNF123	3	49689499	49721529	rs13096357;rs2352974;rs73078367;rs1540293	Intelligence	Savage, 2018	#N/A
AMIGO3	3	49716834	49719695	rs13096357;rs2352974;rs73078367;rs1540293	Intelligence	Savage, 2018	#N/A
GMPPB	3	49716844	49723951	rs13096357;rs2352974;rs73078367;rs1540293	Intelligence	Savage, 2018	#N/A
IP6K1	3	49724294	49786542	rs2352974	Intelligence	Savage, 2018	#N/A
CDHR4	3	49790732	49799835	rs13096357;rs2352974;rs73078367;rs1540293	Intelligence	Savage, 2018	#N/A
UBA7	3	49805207	49813946	rs13096357;rs2352974;rs73078367;rs1540293	Intelligence	Savage, 2018	#N/A
TRAIP	3	49828599	49856574	rs13096357;rs2352974;rs73078367	Intelligence	Savage, 2018	#N/A
CAMKV	3	49857988	49870222	rs2352974;rs73078367	Intelligence	Savage, 2018	#N/A
MST1R	3	49887002	49903873	rs13096357;rs2352974;rs73078367	Intelligence	Savage, 2018	#N/A
MON1A	3	49907160	49930173	rs2352974;rs73078367	Intelligence	Savage, 2018	#N/A
RBM6	3	49940007	50100045	rs13096357;rs2352974;rs73078367	Intelligence	Savage, 2018	#N/A
RBM5	3	50088908	50119021	rs13096357;rs2352974	Intelligence	Savage, 2018	#N/A
SEMA3F	3	50155045	50189075	rs13096357;rs73078367;rs1540293	Intelligence	Savage, 2018	#N/A
GNAT1	3	50191612	50196516	rs2352974	Intelligence	Savage, 2018	#N/A
GNAI2	3	50226292	50259355	rs1540293	Intelligence	Savage, 2018	#N/A
TUSC2	3	50320027	50328251	rs1540293	Intelligence	Savage, 2018	#N/A
NPRL2	3	50347330	50351091	rs1540293	Intelligence	Savage, 2018	#N/A
CACNA2D2	3	50362799	50504244	rs1540293	Intelligence	Savage, 2018	#N/A
WDR82	3	52254421	52288020	rs4687625	Intelligence	Savage, 2018	#N/A
DNAH1	3	52316319	52400491	rs4687625	Intelligence	Savage, 2018	#N/A
PHF7	3	52410657	52423641	rs4687625	Intelligence	Savage, 2018	#N/A
NISCH	3	52455118	52493071	rs4687625	Intelligence	Savage, 2018	#N/A
STAB1	3	52495338	52524495	rs4687625	Intelligence	Savage, 2018	#N/A
NT5DC2	3	52524385	52535054	rs4687625	Intelligence	Savage, 2018	#N/A
SMIM4	3	52534013	52579237	rs4687625	Intelligence	Savage, 2018	#N/A
PBRM1	3	52545352	52685917	rs4687625	Intelligence	Savage, 2018	#N/A
GNL3	3	52681156	52694492	rs4687625	Intelligence	Savage, 2018	#N/A
GLT8D1	3	52694488	52706032	rs4687625	Intelligence	Savage, 2018	#N/A
SPCS1	3	52704955	52711146	rs4687625	Intelligence	Savage, 2018	#N/A
NEK4	3	52708449	52770949	rs4687625	Intelligence	Savage, 2018	#N/A
ITIH1	3	52777592	52792068	rs4687625	Intelligence	Savage, 2018	#N/A
ITIH3	3	52794768	52809009	rs4687625	Intelligence	Savage, 2018	#N/A
ITIH4	3	52812975	52831479	rs4687625	Intelligence	Savage, 2018	#N/A
TMEM110-MUSTN1	3	52833121	52897562	rs4687625	Intelligence	Savage, 2018	#N/A
TMEM110	3	52836220	52897596	rs4687625	Intelligence	Savage, 2018	#N/A
SFMBT1	3	52903572	53046750	rs4687625	Intelligence	Savage, 2018	#N/A
RFT1	3	53088483	53130462	rs4687625	Intelligence	Savage, 2018	#N/A
CACNA2D3	3	54122547	55074557	rs4485754	Intelligence	Savage, 2018	rs4485754
FOXP1	3	70952817	71583993	rs11720523	Intelligence	Savage, 2018	rs11720523
CADM2	3	84958981	86074429	rs6770622	Intelligence	Savage, 2018	#N/A
EPHA3	3	89107524	89482134	rs7652296	Intelligence	Savage, 2018	#N/A
PROS1	3	93873033	93980003	rs62266110	Intelligence	Savage, 2018	rs62266110
ARL13B	3	93980139	94055668	rs62266110	Intelligence	Savage, 2018	rs62266110
DHFRL1	3	94047837	94063389	rs62266110	Intelligence	Savage, 2018	rs62266110
NSUN3	3	94062916	94128545	rs62266110	Intelligence	Savage, 2018	rs62266110
HHLA2	3	108296490	108378285	rs3860537	Intelligence	Savage, 2018	rs3860537
MYH15	3	108380369	108529322	rs3860537	Intelligence	Savage, 2018	rs3860537
PPP2R3A	3	135965673	136147891	rs9853960	Intelligence	Savage, 2018	#N/A
MSL2	3	136148922	136197241	rs9853960	Intelligence	Savage, 2018	#N/A
PCCB	3	136250306	136337896	rs9853960	Intelligence	Savage, 2018	#N/A
STAG1	3	136336233	136752403	rs9853960	Intelligence	Savage, 2018	#N/A
SLC35G2	3	136818647	136855892	rs9853960	Intelligence	Savage, 2018	#N/A
NCK1	3	136862208	136949823	rs9853960	Intelligence	Savage, 2018	#N/A
CLSTN2	3	139935185	140577397	rs59142272	Intelligence	Savage, 2018	#N/A
TFDP2	3	141944428	142149544	rs10804681	Intelligence	Savage, 2018	rs10804681
PCGF3	4	705748	770640	rs12646225	Intelligence	Savage, 2018	rs12646225
RNF4	4	2462220	2625320	rs2295499	Intelligence	Savage, 2018	rs2295499
FAM193A	4	2536631	2732565	rs2295499	Intelligence	Savage, 2018	rs2295499
TNIP2	4	2741648	2756376	rs2295499	Intelligence	Savage, 2018	rs2295499
DCAF16	4	17800655	17810758	rs11932971	Intelligence	Savage, 2018	rs11932971
NCAPG	4	17810902	17844862	rs11932971	Intelligence	Savage, 2018	rs11932971
LCORL	4	17841199	18021876	rs11932971	Intelligence	Savage, 2018	rs11932971
ANAPC4	4	25377213	25418498	rs34811474	Intelligence	Savage, 2018	rs34811474
GRID2	4	92303622	93810157	rs1972860	Intelligence	Savage, 2018	rs1972860
STPG2	4	97184093	98143240	rs4459994	Intelligence	Savage, 2018	rs4459994
BANK1	4	101411286	102074812	rs13107325	Intelligence	Savage, 2018	#N/A
SLC39A8	4	102251041	102431258	rs13107325	Intelligence	Savage, 2018	#N/A
TET2	4	105145875	105279816	rs2726491	Intelligence	Savage, 2018	#N/A
PPA2	4	105369077	105474081	rs2726491	Intelligence	Savage, 2018	#N/A
TTC29	4	146706638	146945882	rs6840804	Intelligence	Savage, 2018	rs6840804
FAM160A1	4	151409216	151663632	rs6535809	Intelligence	Savage, 2018	#N/A
PET112	4	151670505	151761023	rs6535809	Intelligence	Savage, 2018	#N/A
ADCY2	5	7396208	7830081	rs17826816	Intelligence	Savage, 2018	rs17826816
CDH9	5	26880600	27121150	rs75973558	Intelligence	Savage, 2018	rs75973558
PLK2	5	58453982	58460260	rs13157057	Intelligence	Savage, 2018	rs13157057
PDE4D	5	58969038	60522120	rs34426618	Intelligence	Savage, 2018	rs34426618
C5orf64	5	61637708	61751763	rs36033	Intelligence	Savage, 2018	rs36033
SREK1IP1	5	64718144	64768685	rs80170948	Intelligence	Savage, 2018	rs80170948
PAM	5	102753981	103031105	rs76160968	Intelligence	Savage, 2018	rs76160968
GIN1	5	103086000	103120151	rs76160968	Intelligence	Savage, 2018	rs76160968
PPIP5K2	5	103120149	103212799	rs76160968	Intelligence	Savage, 2018	rs76160968
FBXL17	5	107859035	108382098	rs1438660;rs12187824	Intelligence	Savage, 2018	#N/A
MAN2A1	5	109689366	109869625	rs1438660;rs12187824	Intelligence	Savage, 2018	#N/A
NREP	5	111662621	111997464	rs1145123	Intelligence	Savage, 2018	#N/A
CYSTM1	5	140174642	140282052	rs4463213	Intelligence	Savage, 2018	#N/A
PFDN1	5	140245039	140303121	rs4463213;rs778591	Intelligence	Savage, 2018	#N/A
HBEGF	5	140332843	140346631	rs4463213;rs778591	Intelligence	Savage, 2018	#N/A
SLC4A9	5	140360202	140375143	rs778591	Intelligence	Savage, 2018	#N/A
ANKHD1	5	140401814	140539856	rs778591	Intelligence	Savage, 2018	#N/A
ANKHD1-EIF4EBP3	5	140401908	140549569	rs778591	Intelligence	Savage, 2018	#N/A
SRA1	5	140537340	140558252	rs4463213;rs778591	Intelligence	Savage, 2018	#N/A
APBB3	5	140558268	140564781	rs4463213;rs778591	Intelligence	Savage, 2018	#N/A
CD14	5	140631728	140633701	rs778591	Intelligence	Savage, 2018	#N/A
NDUFA2	5	140638740	140647785	rs778591	Intelligence	Savage, 2018	#N/A
TMCO6	5	140639427	140645408	rs4463213;rs778591	Intelligence	Savage, 2018	#N/A
IK	5	140647058	140662479	rs778591	Intelligence	Savage, 2018	#N/A
WDR55	5	140664676	140674124	rs778591	Intelligence	Savage, 2018	#N/A
DND1	5	140670794	140673586	rs778591	Intelligence	Savage, 2018	#N/A
HARS	5	140673904	140691862	rs778591	Intelligence	Savage, 2018	#N/A
HARS2	5	140691426	140699318	rs778591	Intelligence	Savage, 2018	#N/A
ZMAT2	5	140698680	140706676	rs778591	Intelligence	Savage, 2018	#N/A
PCDHA1	5	140786136	141012347	rs778591	Intelligence	Savage, 2018	#N/A
PCDHA2	5	140794852	141012344	rs778591	Intelligence	Savage, 2018	#N/A
PCDHA3	5	140801028	141012344	rs778591	Intelligence	Savage, 2018	#N/A
PCDHA4	5	140806929	141012344	rs778591	Intelligence	Savage, 2018	#N/A
PCDHA5	5	140821604	141012344	rs778591	Intelligence	Savage, 2018	#N/A
PCDHA6	5	140827958	141012344	rs778591	Intelligence	Savage, 2018	#N/A
PCDHA7	5	140834248	141012344	rs778591	Intelligence	Savage, 2018	#N/A
DOCK2	5	169637247	170083382	rs6860963	Intelligence	Savage, 2018	rs6860963
GRK6	5	177403204	177442901	rs2450333	Intelligence	Savage, 2018	rs2450333
PRR7	5	177446445	177456286	rs2450333	Intelligence	Savage, 2018	rs2450333
DBN1	5	177456608	177474401	rs2450333	Intelligence	Savage, 2018	rs2450333
SLC22A23	6	3268962	3457022	rs9503599	Intelligence	Savage, 2018	rs9503599
TMEM170B	6	11538278	11583524	rs566237	Intelligence	Savage, 2018	rs566237
CDKAL1	6	20534457	21232404	rs6456379	Intelligence	Savage, 2018	rs6456379
BTN3A2	6	26365159	26378320	rs35433030	Intelligence	Savage, 2018	rs35433030
BTN3A1	6	26402237	26415216	rs35433030	Intelligence	Savage, 2018	rs35433030
BTN3A3	6	26440472	26453415	rs35433030	Intelligence	Savage, 2018	rs35433030
BTN2A1	6	26457904	26476621	rs35433030	Intelligence	Savage, 2018	rs35433030
BTN1A1	6	26501221	26510422	rs35433030	Intelligence	Savage, 2018	rs35433030
ABT1	6	26596952	26600744	rs35433030	Intelligence	Savage, 2018	rs35433030
ZNF322	6	26634383	26659752	rs35433030;rs1233578	Intelligence	Savage, 2018	#N/A
POM121L2	6	27285903	27312170	rs35433030	Intelligence	Savage, 2018	rs35433030
ZNF391	6	27374615	27403904	rs35433030	Intelligence	Savage, 2018	rs35433030
ZNF184	6	27450743	27473118	rs35433030;rs1233578	Intelligence	Savage, 2018	#N/A
ZSCAN12	6	28378955	28399734	rs1233578	Intelligence	Savage, 2018	#N/A
GPX6	6	28510773	28515743	rs1233578	Intelligence	Savage, 2018	#N/A
SCAND3	6	28571631	28616212	rs1233578	Intelligence	Savage, 2018	#N/A
TRIM27	6	28903002	28923989	rs1233578	Intelligence	Savage, 2018	rs1233578
OR5V1	6	29353749	29431967	rs1233578	Intelligence	Savage, 2018	#N/A
OR12D3	6	29373423	29375291	rs1233578	Intelligence	Savage, 2018	#N/A
OR11A1	6	29425504	29457071	rs1233578	Intelligence	Savage, 2018	#N/A
GABBR1	6	29555178	29632716	rs1233578	Intelligence	Savage, 2018	#N/A
UBD	6	29555515	29559925	rs1233578	Intelligence	Savage, 2018	#N/A
MYO6	6	75749192	75919537	rs1280049	Intelligence	Savage, 2018	rs1280049
ARID1B	6	156776020	157210779	rs287879	Intelligence	Savage, 2018	rs287879
RPA3-AS1	7	7640712	8004059	rs4725065	Intelligence	Savage, 2018	rs4725065
GLCCI1	7	7968794	8094272	rs4725065	Intelligence	Savage, 2018	rs4725065
ZMIZ2	7	44748581	44769881	rs799444	Intelligence	Savage, 2018	rs799444
PPIA	7	44796680	44824564	rs799444	Intelligence	Savage, 2018	#N/A
H2AFV	7	44826791	44848083	rs799444	Intelligence	Savage, 2018	#N/A
PURB	7	44876293	44885361	rs799444	Intelligence	Savage, 2018	#N/A
AUTS2	7	69598296	70793495	rs2030705;rs13223152;rs11972637	Intelligence	Savage, 2018	#N/A
CALN1	7	71779491	72447151	rs56150095	Intelligence	Savage, 2018	#N/A
KMT2E	7	105014179	105114361	rs12535854	Intelligence	Savage, 2018	rs12535854
SRPK2	7	105110704	105399308	rs12535854	Intelligence	Savage, 2018	rs12535854
ZNF800	7	127346790	127431924	rs4731365	Intelligence	Savage, 2018	#N/A
GCC1	7	127580618	127593611	rs4731365;rs4731368	Intelligence	Savage, 2018	#N/A
FSCN3	7	127591409	127602144	rs4731365	Intelligence	Savage, 2018	#N/A
PAX4	7	127610292	127618114	rs4731365	Intelligence	Savage, 2018	#N/A
SND1	7	127652180	128092609	rs4731392	Intelligence	Savage, 2018	#N/A
CALU	7	128739292	128771807	rs1043595	Intelligence	Savage, 2018	rs1043595
SGCZ	8	14089864	15238339	rs13253386	Intelligence	Savage, 2018	#N/A
WRN	8	31033801	31173769	rs10954779	Intelligence	Savage, 2018	rs10954779
RUNX1T1	8	91954967	92103286	rs2920940	Intelligence	Savage, 2018	#N/A
RIMS2	8	103500748	104256094	rs2111490	Intelligence	Savage, 2018	rs2111490
TSNARE1	8	142212080	142403240	rs4976976	Intelligence	Savage, 2018	rs4976976
CYHR1	8	144449582	144465677	rs2721173	Intelligence	Savage, 2018	rs2721173
FOXH1	8	144473412	144476335	rs2721173	Intelligence	Savage, 2018	rs2721173
PPP1R16A	8	144477969	144502121	rs2721173	Intelligence	Savage, 2018	rs2721173
GPT	8	144502973	144507174	rs2721173	Intelligence	Savage, 2018	rs2721173
RECQL4	8	144511288	144517845	rs2721173	Intelligence	Savage, 2018	rs2721173
LRRC14	8	144517992	144525178	rs2721173	Intelligence	Savage, 2018	rs2721173
LRRC24	8	144522377	144527032	rs2721173	Intelligence	Savage, 2018	rs2721173
C8orf82	8	144525733	144529132	rs2721173	Intelligence	Savage, 2018	rs2721173
ARHGAP39	8	144529179	144605816	rs2721173	Intelligence	Savage, 2018	rs2721173
ELAVL2	9	23690104	23826337	rs702222	Intelligence	Savage, 2018	#N/A
PTCH1	9	95442980	95517057	rs28620532	Intelligence	Savage, 2018	#N/A
SLC35D2	9	96313444	96383710	rs1057687	Intelligence	Savage, 2018	rs1057687
ZNF367	9	96385941	96418329	rs1057687	Intelligence	Savage, 2018	rs1057687
HABP4	9	96450201	96491336	rs1057687	Intelligence	Savage, 2018	rs1057687
CDC14B	9	96490241	96619830	rs1057687	Intelligence	Savage, 2018	rs1057687
DOLPP1	9	129081100	129090438	rs913264	Intelligence	Savage, 2018	rs913264
CRAT	9	129094810	129111189	rs913264	Intelligence	Savage, 2018	rs913264
PPP2R4	9	129110951	129148946	rs913264	Intelligence	Savage, 2018	rs913264
IER5L	9	129175552	129178262	rs913264	Intelligence	Savage, 2018	rs913264
NRBF2	10	63133247	63155031	rs2393967	Intelligence	Savage, 2018	#N/A
JMJD1C	10	63167221	63521850	rs2393967	Intelligence	Savage, 2018	rs2393967
REEP3	10	63521363	63625123	rs2393967	Intelligence	Savage, 2018	#N/A
ERLIN1	10	100150094	100188334	rs1408579	Intelligence	Savage, 2018	rs1408579
CHUK	10	100188298	100229619	rs1408579	Intelligence	Savage, 2018	rs1408579
CWF19L1	10	100232298	100267680	rs1408579	Intelligence	Savage, 2018	rs1408579
BLOC1S2	10	100273280	100286712	rs1408579	Intelligence	Savage, 2018	rs1408579
NPM3	10	101781325	101783413	rs3740422	Intelligence	Savage, 2018	#N/A
MGEA5	10	101784444	101818939	rs3740422	Intelligence	Savage, 2018	#N/A
KCNIP2	10	101825974	101843920	rs3740422	Intelligence	Savage, 2018	#N/A
C10orf76	10	101845600	102056193	rs3740422	Intelligence	Savage, 2018	#N/A
LDB1	10	102107560	102120453	rs3740422	Intelligence	Savage, 2018	#N/A
PITX3	10	102230186	102241474	rs3740422;rs12772375	Intelligence	Savage, 2018	#N/A
GBF1	10	102245532	102382899	rs3740422;rs12772375	Intelligence	Savage, 2018	#N/A
NFKB2	10	102394110	102402529	rs3740422	Intelligence	Savage, 2018	#N/A
PSD	10	102402617	102421539	rs3740422	Intelligence	Savage, 2018	#N/A
FBXL15	10	102419189	102423136	rs12772375	Intelligence	Savage, 2018	#N/A
CUEDC2	10	102423245	102432661	rs12772375	Intelligence	Savage, 2018	#N/A
SORCS3	10	104641101	105265235	rs3896224	Intelligence	Savage, 2018	rs3896224
GPR26	10	123666355	123694607	rs35608616	Intelligence	Savage, 2018	rs35608616
PPP2R2D	10	131900644	131959834	rs7921305	Intelligence	Savage, 2018	rs7921305
BNIP3	10	131966455	131982013	rs7921305	Intelligence	Savage, 2018	rs7921305
MYBPC3	11	47331397	47352702	rs11605348	Intelligence	Savage, 2018	rs11605348
SPI1	11	47354860	47378576	rs11605348	Intelligence	Savage, 2018	rs11605348
SLC39A13	11	47407132	47416501	rs11605348	Intelligence	Savage, 2018	rs11605348
PSMC3	11	47418769	47426473	rs11605348	Intelligence	Savage, 2018	rs11605348
RAPSN	11	47437757	47449178	rs11605348	Intelligence	Savage, 2018	rs11605348
CELF1	11	47465933	47565569	rs11605348	Intelligence	Savage, 2018	rs11605348
NDUFS3	11	47565336	47584562	rs11605348	Intelligence	Savage, 2018	rs11605348
PTPMT1	11	47565430	47573461	rs11605348	Intelligence	Savage, 2018	rs11605348
C1QTNF4	11	47589664	47594659	rs11605348	Intelligence	Savage, 2018	rs11605348
MTCH2	11	47617315	47642623	rs11605348	Intelligence	Savage, 2018	rs11605348
AGBL2	11	47659591	47715389	rs11605348	Intelligence	Savage, 2018	rs11605348
FNBP4	11	47716517	47767443	rs11605348	Intelligence	Savage, 2018	rs11605348
NUP160	11	47778087	47848555	rs11605348	Intelligence	Savage, 2018	rs11605348
MACROD1	11	63998558	64166106	rs7941785	Intelligence	Savage, 2018	rs7941785
FAM76B	11	95768942	95790409	rs2508713	Intelligence	Savage, 2018	rs2508713
CEP57	11	95789965	95832693	rs2508713	Intelligence	Savage, 2018	rs2508713
MTMR2	11	95832882	95925315	rs2508713	Intelligence	Savage, 2018	rs2508713
GRIA4	11	105609994	105982092	rs7116046	Intelligence	Savage, 2018	rs7116046
MSANTD4	11	105995623	106022403	rs7116046	Intelligence	Savage, 2018	rs7116046
NCAM1	11	112961247	113278436	rs2885208	Intelligence	Savage, 2018	rs2885208
VWA5A	11	124115362	124147721	rs17128425	Intelligence	Savage, 2018	rs17128425
IGSF9B	11	133908564	133956985	rs329672	Intelligence	Savage, 2018	rs329672
RERG	12	15107783	15348675	rs55754731	Intelligence	Savage, 2018	rs55754731
PTPRO	12	15322397	15597399	rs55754731	Intelligence	Savage, 2018	rs55754731
DDN	12	48995149	48999309	rs1054442;rs146865992	Intelligence	Savage, 2018	#N/A
PRKAG1	12	49002274	49018825	rs1054442;rs146865992	Intelligence	Savage, 2018	#N/A
KMT2D	12	49018975	49059774	rs1054442;rs146865992	Intelligence	Savage, 2018	#N/A
RHEBL1	12	49064685	49070025	rs146865992	Intelligence	Savage, 2018	rs146865992
SYT1	12	78863993	79452008	rs6539284	Intelligence	Savage, 2018	rs6539284
PLEKHG7	12	92702843	92772455	rs7312919	Intelligence	Savage, 2018	#N/A
C12orf74	12	92702844	92708549	rs7312919	Intelligence	Savage, 2018	#N/A
EEA1	12	92770637	92929331	rs7312919	Intelligence	Savage, 2018	#N/A
ABCB9	12	122920951	122981649	rs1727307	Intelligence	Savage, 2018	rs1727307
OGFOD2	12	122974580	122980043	rs1727307	Intelligence	Savage, 2018	rs1727307
ARL6IP4	12	122980060	122982913	rs1727307	Intelligence	Savage, 2018	rs1727307
PITPNM2	12	122983480	123150015	rs1727307	Intelligence	Savage, 2018	rs1727307
MPHOSPH9	12	123152320	123244014	rs1727307	Intelligence	Savage, 2018	rs1727307
C12orf65	12	123232916	123257959	rs1727307	Intelligence	Savage, 2018	rs1727307
CDK2AP1	12	123260971	123272334	rs1727307	Intelligence	Savage, 2018	rs1727307
SBNO1	12	123289109	123364843	rs1727307	Intelligence	Savage, 2018	rs1727307
SETD8	12	123383774	123409358	rs1727307	Intelligence	Savage, 2018	rs1727307
PCDH17	13	57631810	57729311	rs3843954	Intelligence	Savage, 2018	rs3843954
MBNL2	13	97221434	97394120	rs9516855	Intelligence	Savage, 2018	rs9516855
NOVA1	14	26443093	26597754	rs8006700	Intelligence	Savage, 2018	#N/A
PRKD1	14	29576479	30191898	rs971681	Intelligence	Savage, 2018	rs971681
EXD2	14	69191511	69244020	rs17106817	Intelligence	Savage, 2018	rs17106817
DCAF4	14	72926332	72959703	rs1007934	Intelligence	Savage, 2018	rs1007934
ZFYVE1	14	72969451	73027212	rs1007934	Intelligence	Savage, 2018	rs1007934
MARK3	14	103385392	103503831	rs2071407	Intelligence	Savage, 2018	#N/A
CKB	14	103519659	103523111	rs2071407	Intelligence	Savage, 2018	#N/A
TRMT61A	14	103529184	103537073	rs2071407	Intelligence	Savage, 2018	#N/A
BAG5	14	103556544	103562831	rs2071407	Intelligence	Savage, 2018	#N/A
KLC1	14	103561896	103714249	rs2071407	Intelligence	Savage, 2018	#N/A
APOPT1	14	103562962	103607523	rs2071407	Intelligence	Savage, 2018	#N/A
XRCC3	14	103697609	103715504	rs2071407	Intelligence	Savage, 2018	#N/A
PHGR1	15	40351033	40356434	rs11634187	Intelligence	Savage, 2018	#N/A
DISP2	15	40358235	40378639	rs11634187	Intelligence	Savage, 2018	rs11634187
IVD	15	40405795	40435947	rs11634187	Intelligence	Savage, 2018	#N/A
DLL4	15	40929333	40939073	rs11634187	Intelligence	Savage, 2018	#N/A
INO80	15	40978880	41116354	rs75322822	Intelligence	Savage, 2018	#N/A
CHP1	15	41230839	41281890	rs75322822	Intelligence	Savage, 2018	#N/A
RTF1	15	41408408	41483563	rs75322822	Intelligence	Savage, 2018	#N/A
GLDN	15	51341629	51408013	rs7172979	Intelligence	Savage, 2018	#N/A
DMXL2	15	51447711	51622833	rs7172979	Intelligence	Savage, 2018	#N/A
SCG3	15	51681353	51721031	rs7172979	Intelligence	Savage, 2018	rs7172979
TMOD2	15	51751561	51816368	rs7172979	Intelligence	Savage, 2018	#N/A
TMOD3	15	51829628	51947295	rs7172979	Intelligence	Savage, 2018	rs7172979
GNB5	15	52115105	52191369	rs7172979	Intelligence	Savage, 2018	#N/A
IGDCC4	15	65381464	65423072	rs72739469	Intelligence	Savage, 2018	rs72739469
DPP8	15	65442463	65517704	rs72739469	Intelligence	Savage, 2018	rs72739469
DENND4A	15	65658046	65792293	rs72739469	Intelligence	Savage, 2018	rs72739469
RAB11A	15	65726054	65891991	rs72739469	Intelligence	Savage, 2018	rs72739469
EFTUD1	15	82130231	82262763	rs8025964	Intelligence	Savage, 2018	#N/A
FAM154B	15	82262811	82284930	rs8025964	Intelligence	Savage, 2018	#N/A
CPEB1	15	82543201	82648861	rs8025964	Intelligence	Savage, 2018	#N/A
AP3B2	15	82659281	82709914	rs8025964	Intelligence	Savage, 2018	#N/A
NTRK3	15	87859751	88256768	rs1369429	Intelligence	Savage, 2018	rs1369429
RBFOX1	16	5239802	7713338	rs11646221	Intelligence	Savage, 2018	rs11646221
GRIN2A	16	9753404	10182754	rs72774059	Intelligence	Savage, 2018	rs72774059
SNX29	16	11976737	12574289	rs2457192	Intelligence	Savage, 2018	#N/A
SHISA9	16	12901620	13240413	rs62029752;rs276626	Intelligence	Savage, 2018	#N/A
TNRC6A	16	24610209	24827632	rs34172651	Intelligence	Savage, 2018	#N/A
SBK1	16	28292519	28323849	rs2008514	Intelligence	Savage, 2018	#N/A
CLN3	16	28474111	28495575	rs2008514	Intelligence	Savage, 2018	#N/A
APOBR	16	28494649	28498970	rs2008514	Intelligence	Savage, 2018	#N/A
IL27	16	28499362	28512051	rs2008514	Intelligence	Savage, 2018	#N/A
NUPR1	16	28532708	28539174	rs2008514	Intelligence	Savage, 2018	#N/A
CCDC101	16	28553916	28591790	rs2008514	Intelligence	Savage, 2018	#N/A
SULT1A2	16	28591943	28597109	rs2008514	Intelligence	Savage, 2018	#N/A
SULT1A1	16	28605196	28623625	rs2008514	Intelligence	Savage, 2018	#N/A
NPIPB8	16	28637654	28658682	rs2008514	Intelligence	Savage, 2018	#N/A
RABEP2	16	28904421	28936526	rs2008514	Intelligence	Savage, 2018	#N/A
CD19	16	28931939	28939346	rs2008514	Intelligence	Savage, 2018	#N/A
NFATC2IP	16	28950807	28967097	rs2008514	Intelligence	Savage, 2018	#N/A
SPNS1	16	28974221	28984548	rs2008514	Intelligence	Savage, 2018	#N/A
LAT	16	28984826	28990783	rs2008514	Intelligence	Savage, 2018	#N/A
RBL2	16	53433977	53491649	rs8054299	Intelligence	Savage, 2018	#N/A
AKTIP	16	53491040	53504411	rs8054299	Intelligence	Savage, 2018	#N/A
CDH8	16	61647242	62037035	rs12446238	Intelligence	Savage, 2018	rs12446238
DUS2	16	67987746	68079320	rs9888986	Intelligence	Savage, 2018	rs9888986
NFATC3	16	68084751	68229259	rs9888986	Intelligence	Savage, 2018	rs9888986
ESRP2	16	68229111	68238102	rs9888986	Intelligence	Savage, 2018	rs9888986
PLA2G15	16	68245304	68261062	rs9888986	Intelligence	Savage, 2018	rs9888986
SLC7A6	16	68264516	68301823	rs9888986	Intelligence	Savage, 2018	rs9888986
SLC7A6OS	16	68284503	68310946	rs9888986	Intelligence	Savage, 2018	rs9888986
PRMT7	16	68310974	68358563	rs9888986	Intelligence	Savage, 2018	rs9888986
SMPD3	16	68358325	68448688	rs9888986	Intelligence	Savage, 2018	rs9888986
MTSS1L	16	70661204	70686066	rs7196032	Intelligence	Savage, 2018	rs7196032
VAC14	16	70687439	70801161	rs7196032	Intelligence	Savage, 2018	rs7196032
ZNF19	16	71464555	71565089	rs310333	Intelligence	Savage, 2018	#N/A
ATXN1L	16	71845991	71885268	rs8051038	Intelligence	Savage, 2018	#N/A
IST1	16	71845996	71931199	rs8051038	Intelligence	Savage, 2018	#N/A
ZNF821	16	71859680	71895336	rs8051038	Intelligence	Savage, 2018	#N/A
ZNHIT3	17	36486629	36499310	rs2285640	Intelligence	Savage, 2018	rs2285640
MYO19	17	36495633	36543435	rs2285640	Intelligence	Savage, 2018	rs2285640
PIGW	17	36535392	36539682	rs2285640	Intelligence	Savage, 2018	rs2285640
GGNBP2	17	36544888	36589848	rs2285640	Intelligence	Savage, 2018	rs2285640
DHRS11	17	36591798	36600806	rs2285640	Intelligence	Savage, 2018	rs2285640
MRM1	17	36601572	36608971	rs2285640	Intelligence	Savage, 2018	rs2285640
GJC1	17	44798448	44830816	rs4793161	Intelligence	Savage, 2018	rs4793161
EFTUD2	17	44849943	44899662	rs4793161	Intelligence	Savage, 2018	rs4793161
MAPT	17	45906010	46039943	rs17698176	Intelligence	Savage, 2018	#N/A
NSF	17	46590669	46757464	rs17698176	Intelligence	Savage, 2018	#N/A
WNT3	17	47057885	47113984	rs17698176	Intelligence	Savage, 2018	#N/A
IGF2BP1	17	48997412	49055650	rs11079849	Intelligence	Savage, 2018	rs11079849
SUPT4H1	17	58345175	58353093	rs66954617	Intelligence	Savage, 2018	rs66954617
RNF43	17	58352500	58417595	rs66954617	Intelligence	Savage, 2018	rs66954617
HSF5	17	58420167	58488384	rs66954617	Intelligence	Savage, 2018	#N/A
MTMR4	17	58489529	58517905	rs66954617	Intelligence	Savage, 2018	#N/A
SEPT4	17	58520251	58540818	rs66954617	Intelligence	Savage, 2018	#N/A
C17orf47	17	58541587	58544368	rs66954617	Intelligence	Savage, 2018	#N/A
TEX14	17	58556678	58692055	rs66954617	Intelligence	Savage, 2018	#N/A
RAD51C	17	58692573	58735611	rs66954617	Intelligence	Savage, 2018	#N/A
PPM1E	17	58755869	58985176	rs66954617	Intelligence	Savage, 2018	#N/A
TRIM37	17	58982638	59106921	rs66954617	Intelligence	Savage, 2018	#N/A
SKA2	17	59109951	59155269	rs66954617	Intelligence	Savage, 2018	#N/A
DCC	18	52340172	53535903	rs71367283;rs6508220	Intelligence	Savage, 2018	#N/A
SH3GL1	19	4360370	4400547	rs76608582	Intelligence	Savage, 2018	rs76608582
HDGFRP2	19	4472288	4502211	rs76608582	Intelligence	Savage, 2018	rs76608582
NFIX	19	12995608	13098796	rs10411958	Intelligence	Savage, 2018	rs10411958
MAST3	19	18097793	18151692	rs2072490	Intelligence	Savage, 2018	rs2072490
PIK3R2	19	18153118	18170540	rs2072490	Intelligence	Savage, 2018	rs2072490
TSHZ3	19	31274945	31349547	rs7248006	Intelligence	Savage, 2018	#N/A
PAPL	19	39083914	39111493	rs144026674	Intelligence	Savage, 2018	rs144026674
PAK4	19	39125770	39182816	rs144026674	Intelligence	Savage, 2018	rs144026674
NPAS1	19	47019820	47045775	rs889169	Intelligence	Savage, 2018	rs889169
TMEM160	19	47045907	47048630	rs889169	Intelligence	Savage, 2018	rs889169
ZNF584	19	58401504	58418327	rs73068339	Intelligence	Savage, 2018	rs73068339
ZNF132	19	58432814	58440222	rs73068339	Intelligence	Savage, 2018	rs73068339
ZNF324B	19	58451604	58457833	rs73068339	Intelligence	Savage, 2018	rs73068339
ZNF446	19	58474017	58481230	rs73068339	Intelligence	Savage, 2018	rs73068339
SLC27A5	19	58479512	58512413	rs73068339	Intelligence	Savage, 2018	rs73068339
ZBTB45	19	58513530	58538911	rs73068339	Intelligence	Savage, 2018	rs73068339
CHMP2A	19	58551566	58555124	rs73068339	Intelligence	Savage, 2018	rs73068339
MZF1	19	58561931	58573575	rs73068339	Intelligence	Savage, 2018	rs73068339
CPNE1	20	35626031	35664956	rs78084033	Intelligence	Savage, 2018	rs78084033
RBM12	20	35648925	35664956	rs78084033	Intelligence	Savage, 2018	rs78084033
NFS1	20	35668055	35699359	rs78084033	Intelligence	Savage, 2018	rs78084033
ROMO1	20	35699272	35700984	rs78084033	Intelligence	Savage, 2018	rs78084033
RBM39	20	35701347	35742312	rs78084033	Intelligence	Savage, 2018	rs78084033
PHF20	20	35771974	35950381	rs78084033	Intelligence	Savage, 2018	rs78084033
SCAND1	20	35953617	35959472	rs78084033	Intelligence	Savage, 2018	rs78084033
CNBD2	20	35954564	36030700	rs78084033	Intelligence	Savage, 2018	rs78084033
PREX1	20	48624252	48827883	rs6019535	Intelligence	Savage, 2018	#N/A
ARFGEF2	20	48921890	49036693	rs6019535	Intelligence	Savage, 2018	#N/A
STAU1	20	49113339	49188367	rs6019535	Intelligence	Savage, 2018	#N/A
DDX27	20	49219295	49244077	rs6019535	Intelligence	Savage, 2018	#N/A
ZNFX1	20	49237946	49278426	rs6019535	Intelligence	Savage, 2018	#N/A
PSMG1	21	39174769	39183851	rs2836921	Intelligence	Savage, 2018	rs2836921
BRWD1	21	39184176	39321559	rs2836921	Intelligence	Savage, 2018	rs2836921
HMGN1	21	39342315	39349647	rs2836921	Intelligence	Savage, 2018	rs2836921
OSBP2	22	30693782	30907824	rs5753383	Intelligence	Savage, 2018	rs5753383
MORC2	22	30925130	30968298	rs5753383	Intelligence	Savage, 2018	rs5753383
NOL12	22	37681673	37693478	rs4396807	Intelligence	Savage, 2018	rs4396807
TRIOBP	22	37696988	37776556	rs4396807	Intelligence	Savage, 2018	rs4396807
H1F0	22	37805093	37807436	rs4396807	Intelligence	Savage, 2018	rs4396807
GCAT	22	37807905	37817176	rs4396807	Intelligence	Savage, 2018	rs4396807
SYNGR1	22	39349925	39385588	rs5750830	Intelligence	Savage, 2018	#N/A
TAB1	22	39399741	39437060	rs5750830	Intelligence	Savage, 2018	#N/A
MGAT3	22	39457344	39492194	rs5750830;rs5750853	Intelligence	Savage, 2018	#N/A
MIEF1	22	39499432	39518132	rs5750853	Intelligence	Savage, 2018	#N/A
CACNA1I	22	39570753	39689737	rs5750853	Intelligence	Savage, 2018	#N/A
EP300	22	41091786	41180079	rs4821995	Intelligence	Savage, 2018	#N/A
L3MBTL2	22	41205205	41231271	rs4821995	Intelligence	Savage, 2018	rs4821995
CHADL	22	41229510	41240934	rs4821995;rs62236533	Intelligence	Savage, 2018	#N/A
ZC3H7B	22	41301522	41360147	rs4821995	Intelligence	Savage, 2018	#N/A
TEF	22	41367333	41399326	rs4821995	Intelligence	Savage, 2018	rs4821995
PHF5A	22	41459717	41468725	rs4821995;rs62236533	Intelligence	Savage, 2018	#N/A
ACO2	22	41469125	41528989	rs4821995;rs62236533	Intelligence	Savage, 2018	#N/A
XRCC6	22	41621119	41664048	rs4821995	Intelligence	Savage, 2018	#N/A
CCDC134	22	41800679	41826299	rs62236533	Intelligence	Savage, 2018	#N/A
SHISA8	22	41909554	41914667	rs62236533	Intelligence	Savage, 2018	#N/A
FAM109B	22	42074252	42079441	rs62236533	Intelligence	Savage, 2018	#N/A
