# Supplementary material for: Identification of genes involved in the evolution of human intelligence through combination of inter-species and intra-species genetic variations
Source: PeerJ. 2020 Apr 16;8:e8912. doi: 10.7717/peerj.8912 (PMC7167246; doi:10.7717/peerj.8912)
Supplement: Table S3 [file peerj-08-8912-s003.xlsx]

## Sheet: Sheet1
Supplementary Table3. Human-specific STRs located in the genes associated with intelligence
Gene	Chromosome	N HSSTR	STRtype	STR loci	Positional associated SNP	Reference
NEGR1	chr1	1	expansions	chr1:71928076-71928268	rs12128707;rs66495454	Sniekers, 2017; Savage, 2018
DPYD	chr1	3	expansions	chr1:97130724-97130805 chr1:97445474-97445533 chr1:97751373-97751465	rs11804556;rs1473474	Savage, 2018
GATAD2B	chr1	2	expansions	chr1:153830462-153830789 chr1:153861809-153861887	rs112780312	Savage, 2018
NUP210L	chr1	2	expansions	chr1:154103389-154103715 chr1:154125645-154125726	rs112780312	Savage, 2018
NAV1	chr1	1	expansions	chr1:201801986-201802155	rs2678210	Savage, 2018
KLHL29	chr2	2	expansions	chr2:23460715-23460890 chr2:23580352-23580655	rs12470949	Savage, 2018
AFF3	chr2	1	expansions	chr2:99909391-99909509	rs71413877;rs13010010	Sniekers, 2017; Savage, 2018
THSD7B	chr2	1	expansions	chr2:137546352-137546467	rs2558096	Savage, 2018
ARHGAP15	chr2	1	expansions	chr2:143316516-143316574	rs10189912;rs10191758	Sniekers, 2017; Savage, 2018
PLCL1	chr2	3	expansions	chr2:198091686-198091741 chr2:198277609-198277679 chr2:198513628-198513945	rs7573001	Savage, 2018
ARIH2	chr3	1	expansions	chr3:48968205-48968380	rs13096357;rs2352974;rs73078367	Savage, 2018
RNF123	chr3	1	expansions	chr3:49709313-49709617	rs13096357;rs2352974;rs73078367;rs1540293	Savage, 2018
RBM6	chr3	1	expansions	chr3:49984614-49984674	rs13096357;rs2352974;rs73078367	Savage, 2018
DNAH1	chr3	1	expansions	chr3:52335260-52335512	rs4687625	Savage, 2018
STAB1	chr3	1	expansions	chr3:52509368-52509454	rs4687625	Savage, 2018
CACNA2D3	chr3	1	expansions	chr3:54763649-54763889	rs4485754	Savage, 2018
FOXP1	chr3	2	expansions	chr3:71396913-71397107 chr3:71435293-71435918	rs11720523	Savage, 2018
CADM2	chr3	7	expansions	chr3:85108105-85108241 chr3:85212829-85212892 chr3:85336953-85337059 chr3:85347501-85347625 chr3:85628539-85628669 chr3:85657708-85657776 chr3:85768743-85769682	rs6770622	Savage, 2018
MSL2	chr3	1	expansions	chr3:136157191-136157269	rs9853960	Savage, 2018
PCCB	chr3	1	expansions	chr3:136299449-136299735	rs9853960	Savage, 2018
NCK1	chr3	1	expansions	chr3:136867054-136867174	rs9853960	Savage, 2018
CLSTN2	chr3	2	expansions	chr3:140135088-140135146 chr3:140240250-140240310	rs59142272	Savage, 2018
FAM193A	chr4	1	expansions	chr4:2549388-2549708	rs2295499	Savage, 2018
GRID2	chr4	1	expansions	chr4:93232530-93232775	rs1972860	Savage, 2018
BANK1	chr4	1	expansions	chr4:101749307-101750070	rs13107325	Savage, 2018
SLC39A8	chr4	1	expansions	chr4:102408870-102410647	rs13107325	Savage, 2018
PDE4D	chr5	2	expansions	chr5:59434045-59434325 chr5:59771434-59771549	rs34426618	Savage, 2018
PAM	chr5	1	expansions	chr5:102803132-102803209	rs76160968	Savage, 2018
GRK6	chr5	1	expansions	chr5:177420606-177420706	rs2450333	Savage, 2018
PRR7	chr5	1	expansions	chr5:177451488-177451814	rs2450333	Savage, 2018
GABBR1	chr6	1	expansions	chr6:29568359-29568453	rs1233578	Savage, 2018
ARID1B	chr6	1	expansions	chr6:156812971-156813103	rs287879	Savage, 2018
RPA3-AS1	chr7	2	expansions	chr7:7678756-7679099 chr7:7679319-7679379	rs4725065	Savage, 2018
PDE1C	chr7	1	expansions	chr7:32297977-32298075	rs9771228; rs10236197	David, 2016; Sniekers, 2017
AUTS2	chr7	1	expansions	chr7:70750447-70750523	rs2030705;rs13223152;rs11972637	Savage, 2018
CALN1	chr7	3	expansions	chr7:72054400-72054548 chr7:72106692-72106800 chr7:72209170-72209434	rs56150095	Savage, 2018
EXOC4	chr7	1	expansions	chr7:133755242-133755331	rs1362739;rs4728302	Sniekers, 2017; Savage, 2018
RUNX1T1	chr8	1	expansions	chr8:92026822-92027136	rs2920940	Savage, 2018
TSNARE1	chr8	4	expansions	chr8:142282992-142283792 chr8:142326108-142326158 chr8:142338475-142338591 chr8:142397000-142397282	rs4976976	Savage, 2018
PPP1R16A	chr8	1	expansions	chr8:144482513-144482612	rs2721173	Savage, 2018
ARHGAP39	chr8	1	expansions	chr8:144557080-144557656	rs2721173	Savage, 2018
APBA1	chr9	1	expansions	chr9:69523455-69523517	rs11138902	Sniekers, 2017
NRBF2	chr10	1	expansions	chr10:63133967-63134030	rs2393967	Savage, 2018
SORCS3	chr10	3	expansions	chr10:104695962-104696747 chr10:105022829-105022880 chr10:105091485-105091563	rs3896224	Savage, 2018
CELF1	chr11	1	expansions	chr11:47558542-47558594	rs11605348	Savage, 2018
GRIA4	chr11	2	expansions	chr11:105793749-105793812 chr11:105846978-105847094	rs7116046	Savage, 2018
NCAM1	chr11	2	expansions	chr11:113234752-113234847 chr11:113237863-113237937	rs2885208	Savage, 2018
IGSF9B	chr11	1	expansions	chr11:133932598-133933052	rs329672	Savage, 2018
RERG	chr12	1	expansions	chr12:15161139-15161209	rs55754731	Savage, 2018
ABCB9	chr12	1	expansions	chr12:122973281-122973611	rs1727307	Savage, 2018
LINC00343	chr13	1	expansions	chr13:105727861-105727929	rs2251499	Sniekers, 2017
PRKD1	chr14	1	expansions	chr14:29826670-29826842	rs971681	Savage, 2018
AKAP6	chr14	1	expansions	chr14:32510351-32510476	rs17522122;rs2239647	David, 2015; Savage, 2018
FUT8	chr14	1	expansions	chr14:65611191-65611271	14:66113725_C_A	David, 2016
INO80	chr15	1	expansions	chr15:41031913-41032088	rs75322822	Savage, 2018
NTRK3	chr15	2	expansions	chr15:88013024-88013241 chr15:88056876-88057197	rs1369429	Savage, 2018
RBFOX1	chr16	6	expansions	chr16:5825827-5826139 chr16:6256167-6256311 chr16:6450723-6450854 chr16:6779902-6780370 chr16:6852753-6852815 chr16:7229784-7230044	rs11646221	Savage, 2018
GRIN2A	chr16	2	expansions	chr16:9848889-9849199 chr16:10053933-10054151	rs72774059	Savage, 2018
SHISA9	chr16	2	expansions	chr16:12970318-12970456 chr16:13198203-13198307	rs62029752;rs276626	Savage, 2018
CDH8	chr16	1	expansions	chr16:61887128-61887237	rs12446238	Savage, 2018
DUS2	chr16	1	expansions	chr16:68035882-68035980	rs9888986	Savage, 2018
HSF5	chr17	1	expansions	chr17:58449740-58450049	rs66954617	Savage, 2018
DCC	chr18	1	expansions	chr18:52792738-52792866	rs71367283;rs6508220	Savage, 2018
PAK4	chr19	1	expansions	chr19:39147059-39147118	rs144026674	Savage, 2018
PHF20	chr20	1	expansions	chr20:35814578-35814900	rs78084033	Savage, 2018
CNBD2	chr20	2	expansions	chr20:35960693-35960813 chr20:35974980-35975304	rs78084033	Savage, 2018
PREX1	chr20	1	expansions	chr20:48665122-48665260	rs6019535	Savage, 2018
ARFGEF2	chr20	1	expansions	chr20:48928204-48928514	rs6019535	Savage, 2018
BRWD1	chr21	1	expansions	chr21:39256553-39256610	rs2836921	Savage, 2018
TRIOBP	chr22	1	expansions	chr22:37723443-37723533	rs4396807	Savage, 2018
TAB1	chr22	1	expansions	chr22:39423790-39423988	rs5750830	Savage, 2018
CACNA1I	chr22	1	expansions	chr22:39653070-39653168	rs5750853	Savage, 2018
EP300	chr22	2	expansions	chr22:41163152-41163467 chr22:41167564-41167620	rs4821995	Savage, 2018
ZC3H7B	chr22	2	expansions	chr22:41309010-41309314 chr22:41321831-41322153	rs4821995	Savage, 2018
CRTC2	chr1	1	constraction	chr1:153955377	rs112780312	Savage, 2018
CACNA1E	chr1	1	constraction	chr1:181578390	rs199928	Savage, 2018
FNBP4	chr11	1	constraction	chr11:47762415	rs11605348	Savage, 2018
MACROD1	chr11	1	constraction	chr11:64043950	rs7941785	Savage, 2018
KMT2D	chr12	1	constraction	chr12:49032866	rs1054442;rs146865992	Savage, 2018
SH2B3	chr12	1	constraction	chr12:111441099	rs7296313	David, 2016
RBFOX1	chr16	1	constraction	chr16:7470482	rs11646221	Savage, 2018
GRIN2A	chr16	1	constraction	chr16:9928662	rs72774059	Savage, 2018
SNX29	chr16	2	constraction	chr16:12054180 chr16:12379512	rs2457192	Savage, 2018
SHISA9	chr16	1	constraction	chr16:13232773	rs62029752;rs276626	Savage, 2018
TNRC6A	chr16	1	constraction	chr16:24818156	rs34172651	Savage, 2018
HDGFRP2	chr19	4	constraction	chr19:4492526 chr19:4492846 chr19:4492924 chr19:4493069	rs76608582	Savage, 2018
ALMS1	chr2	1	constraction	chr2:73487842	rs11898362	Savage, 2018
SPATS2L	chr2	1	constraction	chr2:200420308	rs10931898	David, 2016
ARFGEF2	chr20	1	constraction	chr20:48959426	rs6019535	Savage, 2018
TCF20	chr22	1	constraction	chr22:42324045	rs2142694;rs36093924;rs62236533	David, 2016; Sniekers, 2017; Savage, 2018
C3orf84	chr3	1	constraction	chr3:49186280	rs13096357;rs2352974	Savage, 2018
MST1R	chr3	1	constraction	chr3:49893430	rs13096357;rs2352974;rs73078367	Savage, 2018
GNAI2	chr3	1	constraction	chr3:50234570	rs1540293	Savage, 2018
CLSTN2	chr3	1	constraction	chr3:139973853	rs59142272	Savage, 2018
PCGF3	chr4	4	constraction	chr4:715427 chr4:715478 chr4:716155 chr4:716461	rs12646225	Savage, 2018
TNIP2	chr4	1	constraction	chr4:2756436	rs2295499	Savage, 2018
ARID1B	chr6	1	constraction	chr6:156975992	rs287879	Savage, 2018
CALN1	chr7	2	constraction	chr7:72442503 chr7:72442570	rs56150095	Savage, 2018
TSNARE1	chr8	4	constraction	chr8:142272394 chr8:142272554 chr8:142296267 chr8:142400647	rs4976976	Savage, 2018
ARHGAP39	chr8	2	constraction	chr8:144592407 chr8:144596213	rs2721173	Savage, 2018
