# Supplementary material for: Identification of genes involved in the evolution of human intelligence through combination of inter-species and intra-species genetic variations
Source: PeerJ. 2020 Apr 16;8:e8912. doi: 10.7717/peerj.8912 (PMC7167246; doi:10.7717/peerj.8912)
Supplement: Table S4 [file peerj-08-8912-s004.xlsx]

## Sheet: sheet1
Supplementary Table4 Human-specific insertion/deletion located in genes associated with intelligence
Gene	Chromosome	SV_type	SV_Star	SV_End	SV_length	Positional associated SNP	Reference
SCMH1	1	insertion	41207764	41208454	690	rs12025777;rs12744310	Sniekers, 2017; Savage, 2018
KDM4A	1	deletion	43656932	-	466	rs2842188	Savage, 2018
ST3GAL3	1	deletion	43760636	-	1468	rs2842188;rs4660749	Savage, 2018
NEGR1	1	insertion	71513697	71519774	6077	rs12128707;rs66495454	Sniekers, 2017; Savage, 2018
NEGR1	1	insertion	71602239	71602565	326	rs12128707;rs66495454	Sniekers, 2017; Savage, 2018
NEGR1	1	insertion	71609230	71609568	338	rs12128707;rs66495454	Sniekers, 2017; Savage, 2018
NEGR1	1	deletion	71744475	-	8655	rs12128707;rs66495454	Sniekers, 2017; Savage, 2018
NEGR1	1	insertion	71749991	71750306	315	rs12128707;rs66495454	Sniekers, 2017; Savage, 2018
NEGR1	1	insertion	71888202	71894264	6062	rs12128707;rs66495454	Sniekers, 2017; Savage, 2018
NEGR1	1	insertion	72025828	72026152	324	rs12128707;rs66495454	Sniekers, 2017; Savage, 2018
NEGR1	1	insertion	72257039	72257355	316	rs12128707;rs66495454	Sniekers, 2017; Savage, 2018
TTLL7	1	insertion	83990160	83990475	315	rs41293013	Savage, 2018
DPYD	1	insertion	97203432	97203687	255	rs11804556;rs1473474	Savage, 2018
DPYD	1	insertion	97317939	97322285	4346	rs11804556;rs1473474	Savage, 2018
DPYD	1	deletion	97439993	-	812	rs11804556;rs1473474	Savage, 2018
DPYD	1	insertion	97477591	97477894	303	rs11804556;rs1473474	Savage, 2018
DPYD	1	insertion	97686340	97686662	322	rs11804556;rs1473474	Savage, 2018
DPYD	1	deletion	97748280	-	283	rs11804556;rs1473474	Savage, 2018
DPYD	1	insertion	97838547	97838869	322	rs11804556;rs1473474	Savage, 2018
COL11A1	1	deletion	103011691	-	53	rs1528204	Savage, 2018
MYBPHL	1	insertion	109304467	109304651	184	rs1144593	Savage, 2018
GATAD2B	1	insertion	153830462	153830789	327	rs112780312	Savage, 2018
GATAD2B	1	insertion	153844565	153844937	372	rs112780312	Savage, 2018
NUP210L	1	insertion	154103389	154103715	326	rs112780312	Savage, 2018
NUP210L	1	insertion	154125740	154126067	327	rs112780312	Savage, 2018
CACNA1E	1	deletion	181613552	-	920	rs199928	Savage, 2018
CACNA1E	1	deletion	181776026	-	787	rs199928	Savage, 2018
NAV1	1	insertion	201771159	201771264	105	rs2678210	Savage, 2018
NAV1	1	insertion	201801986	201802155	169	rs2678210	Savage, 2018
LMOD1	1	deletion	201915898	-	324	rs2678210	Savage, 2018
ESRRG	1	deletion	216626848	-	4357	rs10779271	Savage, 2018
ESRRG	1	deletion	216948560	-	590	rs10779271	Savage, 2018
KLHL29	2	insertion	23434031	23434347	316	rs12470949	Savage, 2018
KLHL29	2	insertion	23460715	23460890	175	rs12470949	Savage, 2018
LRPPRC	2	deletion	43952906	-	4276	rs2955280	Savage, 2018
LRPPRC	2	deletion	43995212	-	87	rs2955280	Savage, 2018
NRXN1	2	insertion	50070487	50070798	311	rs7557525	Savage, 2018
NRXN1	2	deletion	50146470	-	3405	rs7557525	Savage, 2018
NRXN1	2	deletion	50146625	-	958	rs7557525	Savage, 2018
NRXN1	2	insertion	50481748	50482068	320	rs7557525	Savage, 2018
NRXN1	2	deletion	50495087	-	187	rs7557525	Savage, 2018
NRXN1	2	insertion	50827590	50829782	2192	rs7557525	Savage, 2018
NRXN1	2	insertion	50951937	50952255	318	rs7557525	Savage, 2018
NRXN1	2	deletion	50984274	-	415	rs7557525	Savage, 2018
NRXN1	2	deletion	51042539	-	479	rs7557525	Savage, 2018
NRXN1	2	insertion	51048289	51048593	304	rs7557525	Savage, 2018
NRXN1	2	deletion	51122496	-	3915	rs7557525	Savage, 2018
WDPCP	2	insertion	63291854	63292159	305	rs2576835	Savage, 2018
WDPCP	2	insertion	63733173	63733504	331	rs2576835	Savage, 2018
WDPCP	2	insertion	63808272	63809945	1673	rs2576835	Savage, 2018
UGP2	2	deletion	63862803	-	2296	rs2576835	Savage, 2018
UGP2	2	insertion	63877697	63878028	331	rs2576835	Savage, 2018
VPS54	2	deletion	63921666	-	53	rs2576835	Savage, 2018
VPS54	2	insertion	64005077	64005402	325	rs2576835	Savage, 2018
VPS54	2	deletion	64014063	-	269	rs2576835	Savage, 2018
PELI1	2	deletion	64127004	-	1266	rs2576835	Savage, 2018
PAIP2B	2	insertion	71198281	71198585	304	rs4852252	Savage, 2018
ZNF638	2	deletion	71342115	-	376	rs4852252;rs6746731	Sniekers, 2017; Savage, 2018
ZNF638	2	insertion	71411435	71417506	6071	rs4852252;rs6746731	Sniekers, 2017; Savage, 2018
DYSF	2	insertion	71542368	71543988	1620	rs4852252	Savage, 2018
DYSF	2	insertion	71641163	71641449	286	rs4852252	Savage, 2018
ALMS1	2	deletion	73487842	-	70	rs11898362	Savage, 2018
ALMS1	2	deletion	73517054	-	1112	rs11898362	Savage, 2018
AFF3	2	deletion	99554281	-	1250	rs71413877;rs13010010	Sniekers, 2017; Savage, 2018
AFF3	2	insertion	99966407	99966732	325	rs71413877;rs13010010	Sniekers, 2017; Savage, 2018
AFF3	2	insertion	100121776	100122106	330	rs71413877;rs13010010	Sniekers, 2017; Savage, 2018
THSD7B	2	insertion	136817257	136818570	1313	rs2558096	Savage, 2018
THSD7B	2	deletion	137078396	-	3502	rs2558096	Savage, 2018
THSD7B	2	insertion	137238519	137238853	334	rs2558096	Savage, 2018
THSD7B	2	deletion	137333693	-	1212	rs2558096	Savage, 2018
THSD7B	2	deletion	137518952	-	2192	rs2558096	Savage, 2018
THSD7B	2	insertion	137581639	137581790	151	rs2558096	Savage, 2018
THSD7B	2	insertion	137598833	137599707	874	rs2558096	Savage, 2018
ARHGAP15	2	insertion	143579858	143579994	136	rs10189912;rs10191758	Sniekers, 2017; Savage, 2018
GPD2	2	insertion	156609983	156610301	318	rs6436555	Savage, 2018
RBMS1	2	insertion	160438250	160440207	1957	rs17221725;rs10192369	Savage, 2018
RBMS1	2	insertion	160455672	160455982	310	rs17221725;rs10192369	Savage, 2018
RBMS1	2	insertion	160476539	160476854	315	rs17221725;rs10192369	Savage, 2018
SLC4A10	2	deletion	161795338	-	155	rs2268894	Savage, 2018
SLC4A10	2	insertion	161906804	161907088	284	rs2268894	Savage, 2018
ZNF385B	2	insertion	179503651	179505318	1667	rs10196283	Savage, 2018
ZNF385B	2	insertion	179836508	179836822	314	rs10196283	Savage, 2018
RFTN2	2	deletion	197566657	-	14010	rs7573001	Savage, 2018
RFTN2	2	insertion	197618033	197619788	1755	rs7573001	Savage, 2018
PLCL1	2	insertion	197836182	197836472	290	rs7573001	Savage, 2018
PLCL1	2	insertion	197899621	197899935	314	rs7573001	Savage, 2018
PLCL1	2	insertion	197921986	197924315	2329	rs7573001	Savage, 2018
PLCL1	2	insertion	197974847	197975173	326	rs7573001	Savage, 2018
PLCL1	2	insertion	198132699	198133570	871	rs7573001	Savage, 2018
PLCL1	2	insertion	198513628	198513945	317	rs7573001	Savage, 2018
PLCL2	3	insertion	16979333	16981171	1838	rs73139272;rs6779302	Sniekers, 2017; Savage, 2018
UBE2E1	3	insertion	23870661	23872402	1741	rs6550835	Savage, 2018
THRB	3	insertion	24207508	24207708	200	rs6550835	Savage, 2018
THRB	3	insertion	24330010	24330326	316	rs6550835	Savage, 2018
THRB	3	insertion	24463955	24464275	320	rs6550835	Savage, 2018
IP6K2	3	insertion	48733457	48735459	2002	rs13096357;rs73078367	Savage, 2018
PRKAR2A	3	deletion	48798923	-	1139	rs13096357;rs73078367	Savage, 2018
ARIH2	3	insertion	48920289	48920608	319	rs13096357;rs2352974;rs73078367	Savage, 2018
ARIH2	3	insertion	48923032	48923225	193	rs13096357;rs2352974;rs73078367	Savage, 2018
ARIH2	3	insertion	48968205	48968380	175	rs13096357;rs2352974;rs73078367	Savage, 2018
QRICH1	3	insertion	49050054	49050276	222	rs13096357;rs2352974;rs73078367	Savage, 2018
CCDC36	3	insertion	49202859	49203045	186	rs13096357;rs2352974;rs1540293	Savage, 2018
RHOA	3	deletion	49401479	-	2856	rs13096357;rs2352974;rs1540293	Savage, 2018
RNF123	3	insertion	49709313	49709617	304	rs13096357;rs2352974;rs73078367;rs1540293	Savage, 2018
RBM6	3	deletion	50064725	-	902	rs13096357;rs2352974;rs73078367	Savage, 2018
RBM6	3	insertion	50083641	50085899	2258	rs13096357;rs2352974;rs73078367	Savage, 2018
STAB1	3	insertion	52499616	52499928	312	rs4687625	Savage, 2018
NEK4	3	deletion	52741203	-	1307	rs4687625	Savage, 2018
NEK4	3	insertion	52766703	52767015	312	rs4687625	Savage, 2018
SFMBT1	3	deletion	52951656	-	4034	rs4687625	Savage, 2018
SFMBT1	3	insertion	53012404	53012710	306	rs4687625	Savage, 2018
CACNA2D3	3	insertion	54394316	54400332	6016	rs4485754	Savage, 2018
CACNA2D3	3	insertion	54763649	54763889	240	rs4485754	Savage, 2018
CACNA2D3	3	insertion	54809309	54809624	315	rs4485754	Savage, 2018
CACNA2D3	3	deletion	54966267	-	327	rs4485754	Savage, 2018
CACNA2D3	3	deletion	54975513	-	697	rs4485754	Savage, 2018
FOXP1	3	deletion	71162689	-	1760	rs11720523	Savage, 2018
FOXP1	3	insertion	71396913	71397107	194	rs11720523	Savage, 2018
FOXP1	3	insertion	71435293	71435918	625	rs11720523	Savage, 2018
FOXP1	3	deletion	71460722	-	449	rs11720523	Savage, 2018
CADM2	3	insertion	85175922	85176062	140	rs6770622	Savage, 2018
CADM2	3	insertion	85212829	85212892	63	rs6770622	Savage, 2018
CADM2	3	insertion	85336953	85337059	106	rs6770622	Savage, 2018
CADM2	3	insertion	85467890	85468191	301	rs6770622	Savage, 2018
CADM2	3	insertion	85637319	85637664	345	rs6770622	Savage, 2018
CADM2	3	insertion	85768743	85769682	939	rs6770622	Savage, 2018
CADM2	3	insertion	85897242	85897580	338	rs6770622	Savage, 2018
CADM2	3	deletion	85947229	-	1042	rs6770622	Savage, 2018
ARL13B	3	deletion	94040681	-	211	rs62266110	Savage, 2018
PCCB	3	insertion	136279659	136279966	307	rs9853960	Savage, 2018
PCCB	3	insertion	136299449	136299735	286	rs9853960	Savage, 2018
STAG1	3	insertion	136479046	136485104	6058	rs9853960	Savage, 2018
STAG1	3	insertion	136580509	136580833	324	rs9853960	Savage, 2018
STAG1	3	insertion	136722580	136724610	2030	rs9853960	Savage, 2018
CLSTN2	3	insertion	140135088	140135146	58	rs59142272	Savage, 2018
CLSTN2	3	insertion	140549200	140550613	1413	rs59142272	Savage, 2018
TFDP2	3	insertion	142010628	142011631	1003	rs10804681	Savage, 2018
TFDP2	3	insertion	142030741	142031056	315	rs10804681	Savage, 2018
TFDP2	3	deletion	142144111	-	2011	rs10804681	Savage, 2018
PCGF3	4	insertion	711443	711772	329	rs12646225	Savage, 2018
RNF4	4	insertion	2522113	2522434	321	rs2295499	Savage, 2018
FAM193A	4	insertion	2549388	2549708	320	rs2295499	Savage, 2018
GRID2	4	deletion	92294285	-	11475	rs1972860	Savage, 2018
GRID2	4	insertion	93123948	93124130	182	rs1972860	Savage, 2018
GRID2	4	insertion	93126573	93126890	317	rs1972860	Savage, 2018
GRID2	4	insertion	93200271	93200593	322	rs1972860	Savage, 2018
GRID2	4	deletion	93267293	-	3378	rs1972860	Savage, 2018
GRID2	4	insertion	93608277	93614339	6062	rs1972860	Savage, 2018
GRID2	4	insertion	93616544	93616622	78	rs1972860	Savage, 2018
GRID2	4	insertion	93783788	93784107	319	rs1972860	Savage, 2018
STPG2	4	insertion	97234895	97235203	308	rs4459994	Savage, 2018
STPG2	4	insertion	97260111	97260432	321	rs4459994	Savage, 2018
STPG2	4	deletion	97449812	-	834	rs4459994	Savage, 2018
STPG2	4	insertion	97454220	97454557	337	rs4459994	Savage, 2018
STPG2	4	deletion	97815015	-	1359	rs4459994	Savage, 2018
STPG2	4	insertion	97848621	97850634	2013	rs4459994	Savage, 2018
STPG2	4	deletion	97865597	-	237	rs4459994	Savage, 2018
BANK1	4	deletion	101422878	-	3650	rs13107325	Savage, 2018
BANK1	4	insertion	101530218	101530350	132	rs13107325	Savage, 2018
BANK1	4	deletion	101758097	-	231	rs13107325	Savage, 2018
BANK1	4	insertion	101803701	101804025	324	rs13107325	Savage, 2018
BANK1	4	insertion	101839927	101840267	340	rs13107325	Savage, 2018
BANK1	4	insertion	101889349	101889625	276	rs13107325	Savage, 2018
BANK1	4	deletion	101898890	-	2602	rs13107325	Savage, 2018
BANK1	4	deletion	101990081	-	4838	rs13107325	Savage, 2018
TET2	4	deletion	105219050	-	50	rs2726491	Savage, 2018
FAM160A1	4	insertion	151525738	151527590	1852	rs6535809	Savage, 2018
ADCY2	5	insertion	7411794	7412096	302	rs17826816	Savage, 2018
ADCY2	5	insertion	7507159	7507470	311	rs17826816	Savage, 2018
ADCY2	5	insertion	7603785	7606148	2363	rs17826816	Savage, 2018
ADCY2	5	deletion	7639346	-	75	rs17826816	Savage, 2018
ADCY2	5	insertion	7699087	7699412	325	rs17826816	Savage, 2018
CDH9	5	insertion	26909528	26909666	138	rs75973558	Savage, 2018
CDH9	5	insertion	27046815	27047729	914	rs75973558	Savage, 2018
CDH9	5	deletion	27076473	-	196	rs75973558	Savage, 2018
PDE4D	5	deletion	59072540	-	239	rs34426618	Savage, 2018
PDE4D	5	insertion	59218870	59219211	341	rs34426618	Savage, 2018
PDE4D	5	insertion	59284414	59285241	827	rs34426618	Savage, 2018
PDE4D	5	insertion	59434045	59434325	280	rs34426618	Savage, 2018
PDE4D	5	insertion	59477307	59477379	72	rs34426618	Savage, 2018
PDE4D	5	deletion	59544992	-	295	rs34426618	Savage, 2018
PDE4D	5	insertion	59970212	59971378	1166	rs34426618	Savage, 2018
PDE4D	5	insertion	60030167	60030496	329	rs34426618	Savage, 2018
PDE4D	5	insertion	60091769	60092086	317	rs34426618	Savage, 2018
PDE4D	5	insertion	60167265	60167538	273	rs34426618	Savage, 2018
PDE4D	5	deletion	60219771	-	335	rs34426618	Savage, 2018
PDE4D	5	insertion	60271150	60271370	220	rs34426618	Savage, 2018
PDE4D	5	insertion	60303294	60303609	315	rs34426618	Savage, 2018
PDE4D	5	insertion	60304361	60304688	327	rs34426618	Savage, 2018
PDE4D	5	deletion	60311320	-	8375	rs34426618	Savage, 2018
PDE4D	5	deletion	60400889	-	70	rs34426618	Savage, 2018
PDE4D	5	insertion	60429841	60432132	2291	rs34426618	Savage, 2018
PDE4D	5	insertion	60491987	60492149	162	rs34426618	Savage, 2018
PAM	5	insertion	102801775	102802096	321	rs76160968	Savage, 2018
PAM	5	deletion	102883977	-	3868	rs76160968	Savage, 2018
PAM	5	deletion	102889650	-	93	rs76160968	Savage, 2018
PAM	5	insertion	102926096	102926272	176	rs76160968	Savage, 2018
PPIP5K2	5	insertion	103140566	103140866	300	rs76160968	Savage, 2018
FBXL17	5	deletion	108119106	-	959	rs1438660;rs12187824	Savage, 2018
FBXL17	5	deletion	108271376	-	225	rs1438660;rs12187824	Savage, 2018
MAN2A1	5	deletion	109760815	-	1982	rs1438660;rs12187824	Savage, 2018
MAN2A1	5	deletion	109847252	-	872	rs1438660;rs12187824	Savage, 2018
NREP	5	insertion	111981884	111982212	328	rs1145123	Savage, 2018
ANKHD1-EIF4EBP3	5	insertion	140426489	140428683	2194	rs778591	Savage, 2018
PCDHA7	5	insertion	141005421	141005730	309	rs778591	Savage, 2018
DOCK2	5	deletion	169818946	-	241	rs6860963	Savage, 2018
DOCK2	5	insertion	169857447	169857569	122	rs6860963	Savage, 2018
DOCK2	5	insertion	169997276	169997835	559	rs6860963	Savage, 2018
DOCK2	5	insertion	170004255	170005090	835	rs6860963	Savage, 2018
DOCK2	5	deletion	170049143	-	67	rs6860963	Savage, 2018
DBN1	5	insertion	177461095	177461411	316	rs2450333	Savage, 2018
SLC22A23	6	insertion	3298689	3299003	314	rs9503599	Savage, 2018
CDKAL1	6	insertion	20544315	20544633	318	rs6456379	Savage, 2018
CDKAL1	6	insertion	20875016	20875337	321	rs6456379	Savage, 2018
CDKAL1	6	insertion	20936253	20936563	310	rs6456379	Savage, 2018
CDKAL1	6	insertion	21191991	21192333	342	rs6456379	Savage, 2018
SCAND3	6	deletion	28574485	-	263	rs1233578	Savage, 2018
OR5V1	6	deletion	29387932	-	1414	rs1233578	Savage, 2018
OR11A1	6	insertion	29454880	29454935	55	rs1233578	Savage, 2018
GABBR1	6	insertion	29568359	29568453	94	rs1233578	Savage, 2018
MYO6	6	deletion	75824700	-	77	rs1280049	Savage, 2018
AFG1L	6	insertion	108316093	108316412	319	rs2490272	Sniekers, 2017
AFG1L	6	insertion	108401132	108401450	318	rs2490272	Sniekers, 2017
AFG1L	6	insertion	108420367	108420449	82	rs2490272	Sniekers, 2017
FOXO3	6	insertion	108585023	108585358	335	rs9384679;rs2490272	Sniekers, 2017; Savage, 2018
FOXO3	6	deletion	108675499	-	830	rs9384679;rs2490272	Sniekers, 2017; Savage, 2018
ARID1B	6	insertion	156812971	156813103	132	rs287879	Savage, 2018
ARID1B	6	insertion	157039326	157039559	233	rs287879	Savage, 2018
ARID1B	6	deletion	157203179	-	87	rs287879	Savage, 2018
RPA3-AS1	7	insertion	7677643	7677973	330	rs4725065	Savage, 2018
RPA3-AS1	7	insertion	7784748	7784968	220	rs4725065	Savage, 2018
RPA3-AS1	7	insertion	7846807	7847149	342	rs4725065	Savage, 2018
PDE1C	7	deletion	31870836	-	1142	rs9771228; rs10236197	David, 2016; Sniekers, 2017
PDE1C	7	deletion	31972455	-	2839	rs9771228; rs10236197	David, 2016; Sniekers, 2017
PDE1C	7	insertion	32097947	32098257	310	rs9771228; rs10236197	David, 2016; Sniekers, 2017
PDE1C	7	insertion	32186084	32186414	330	rs9771228; rs10236197	David, 2016; Sniekers, 2017
AUTS2	7	insertion	69611647	69611961	314	rs2030705;rs13223152;rs11972637	Savage, 2018
AUTS2	7	insertion	69634124	69634433	309	rs2030705;rs13223152;rs11972637	Savage, 2018
AUTS2	7	deletion	69876222	-	300	rs2030705;rs13223152;rs11972637	Savage, 2018
AUTS2	7	insertion	70162163	70162492	329	rs2030705;rs13223152;rs11972637	Savage, 2018
AUTS2	7	insertion	70197310	70203985	6675	rs2030705;rs13223152;rs11972637	Savage, 2018
AUTS2	7	deletion	70248215	-	1623	rs2030705;rs13223152;rs11972637	Savage, 2018
AUTS2	7	insertion	70430827	70431143	316	rs2030705;rs13223152;rs11972637	Savage, 2018
CALN1	7	insertion	72027744	72028080	336	rs56150095	Savage, 2018
CALN1	7	insertion	72054400	72054548	148	rs56150095	Savage, 2018
CALN1	7	insertion	72209170	72209434	264	rs56150095	Savage, 2018
CALN1	7	insertion	72220014	72221123	1109	rs56150095	Savage, 2018
CALN1	7	deletion	72221700	-	2994	rs56150095	Savage, 2018
KMT2E	7	insertion	105043217	105043536	319	rs12535854	Savage, 2018
SRPK2	7	deletion	105154800	-	1574	rs12535854	Savage, 2018
SRPK2	7	deletion	105177749	-	740	rs12535854	Savage, 2018
SRPK2	7	insertion	105286968	105287288	320	rs12535854	Savage, 2018
SRPK2	7	insertion	105290747	105291064	317	rs12535854	Savage, 2018
SRPK2	7	deletion	105326085	-	233	rs12535854	Savage, 2018
SND1	7	insertion	127786646	127786951	305	rs4731392	Savage, 2018
SND1	7	deletion	127808446	-	749	rs4731392	Savage, 2018
SND1	7	insertion	127963247	127966961	3714	rs4731392	Savage, 2018
EXOC4	7	insertion	133331438	133331731	293	rs1362739;rs4728302	Sniekers, 2017; Savage, 2018
EXOC4	7	insertion	133338309	133338624	315	rs1362739;rs4728302	Sniekers, 2017; Savage, 2018
EXOC4	7	insertion	133581463	133581777	314	rs1362739;rs4728302	Sniekers, 2017; Savage, 2018
EXOC4	7	insertion	133710363	133710675	312	rs1362739;rs4728302	Sniekers, 2017; Savage, 2018
EXOC4	7	insertion	133772454	133772535	81	rs1362739;rs4728302	Sniekers, 2017; Savage, 2018
EXOC4	7	deletion	133831309	-	276	rs1362739;rs4728302	Sniekers, 2017; Savage, 2018
EXOC4	7	insertion	133889352	133895456	6104	rs1362739;rs4728302	Sniekers, 2017; Savage, 2018
EXOC4	7	deletion	133942411	-	313	rs1362739;rs4728302	Sniekers, 2017; Savage, 2018
WRN	8	deletion	31035686	-	229	rs10954779	Savage, 2018
RIMS2	8	insertion	103623479	103623798	319	rs2111490	Savage, 2018
RIMS2	8	deletion	103758912	-	1298	rs2111490	Savage, 2018
RIMS2	8	deletion	103978362	-	158	rs2111490	Savage, 2018
TSNARE1	8	deletion	142244180	-	640	rs4976976	Savage, 2018
TSNARE1	8	deletion	142300699	-	735	rs4976976	Savage, 2018
TSNARE1	8	insertion	142397000	142397282	282	rs4976976	Savage, 2018
ARHGAP39	8	deletion	144584315	-	1606	rs2721173	Savage, 2018
ELAVL2	9	deletion	23775324	-	186	rs702222	Savage, 2018
APBA1	9	insertion	69477090	69483171	6081	rs11138902	Sniekers, 2017
APBA1	9	insertion	69523455	69523517	62	rs11138902	Sniekers, 2017
APBA1	9	insertion	69656832	69657150	318	rs11138902	Sniekers, 2017
SLC35D2	9	insertion	96371717	96372042	325	rs1057687	Savage, 2018
NRBF2	10	deletion	63145258	-	218	rs2393967	Savage, 2018
JMJD1C	10	insertion	63180773	63181037	264	rs2393967	Savage, 2018
JMJD1C	10	deletion	63196368	-	125	rs2393967	Savage, 2018
REEP3	10	insertion	63556593	63556931	338	rs2393967	Savage, 2018
REEP3	10	deletion	63593088	-	554	rs2393967	Savage, 2018
ERLIN1	10	insertion	100155505	100155828	323	rs1408579	Savage, 2018
CHUK	10	insertion	100210063	100210387	324	rs1408579	Savage, 2018
BLOC1S2	10	insertion	100276289	100278806	2517	rs1408579	Savage, 2018
GBF1	10	insertion	102288428	102288756	328	rs3740422;rs12772375	Savage, 2018
SORCS3	10	insertion	104695962	104696747	785	rs3896224	Savage, 2018
SORCS3	10	insertion	104784908	104785611	703	rs3896224	Savage, 2018
SORCS3	10	insertion	105022829	105022880	51	rs3896224	Savage, 2018
ADAM12	10	insertion	126338250	126338566	316	rs4962322	Zabaneh, 2018
NUP160	11	deletion	47841925	-	2930	rs11605348	Savage, 2018
MACROD1	11	deletion	64153824	-	1776	rs7941785	Savage, 2018
GRIA4	11	deletion	105754761	-	3804	rs7116046	Savage, 2018
GRIA4	11	insertion	105779441	105779665	224	rs7116046	Savage, 2018
GRIA4	11	insertion	105888268	105888585	317	rs7116046	Savage, 2018
NCAM1	11	deletion	113188740	-	232	rs2885208	Savage, 2018
NCAM1	11	insertion	113199599	113199859	260	rs2885208	Savage, 2018
NCAM1	11	insertion	113216150	113216462	312	rs2885208	Savage, 2018
NCAM1	11	insertion	113259054	113259364	310	rs2885208	Savage, 2018
VWA5A	11	insertion	124135522	124135843	321	rs17128425	Savage, 2018
IGSF9B	11	insertion	133932598	133933052	454	rs329672	Savage, 2018
RERG	12	deletion	15107134	-	69	rs55754731	Savage, 2018
RERG	12	insertion	15155928	15156003	75	rs55754731	Savage, 2018
RERG	12	insertion	15166779	15166936	157	rs55754731	Savage, 2018
RERG	12	insertion	15212046	15212372	326	rs55754731	Savage, 2018
RERG	12	insertion	15282871	15284095	1224	rs55754731	Savage, 2018
PTPRO	12	insertion	15476379	15477518	1139	rs55754731	Savage, 2018
PTPRO	12	deletion	15537618	-	94	rs55754731	Savage, 2018
SYT1	12	insertion	79122231	79122548	317	rs6539284	Savage, 2018
SYT1	12	insertion	79145735	79146066	331	rs6539284	Savage, 2018
SYT1	12	insertion	79177035	79178106	1071	rs6539284	Savage, 2018
SYT1	12	insertion	79211438	79211819	381	rs6539284	Savage, 2018
SYT1	12	insertion	79249088	79249418	330	rs6539284	Savage, 2018
SYT1	12	insertion	79313884	79314197	313	rs6539284	Savage, 2018
EEA1	12	insertion	92831789	92832108	319	rs7312919	Savage, 2018
EEA1	12	deletion	92909779	-	602	rs7312919	Savage, 2018
EEA1	12	deletion	92921753	-	3429	rs7312919	Savage, 2018
ATXN2	12	insertion	111535717	111536027	310	rs7296313	David, 2016
ABCB9	12	deletion	122930556	-	1819	rs1727307	Savage, 2018
ABCB9	12	insertion	122973281	122973611	330	rs1727307	Savage, 2018
PITPNM2	12	insertion	123048402	123048725	323	rs1727307	Savage, 2018
PCDH17	13	insertion	57651995	57652312	317	rs3843954	Savage, 2018
MBNL2	13	insertion	97251822	97252150	328	rs9516855	Savage, 2018
MBNL2	13	insertion	97290379	97290705	326	rs9516855	Savage, 2018
PRKD1	14	insertion	29737032	29737359	327	rs971681	Savage, 2018
PRKD1	14	insertion	29826670	29826842	172	rs971681	Savage, 2018
PRKD1	14	deletion	29869703	-	1515	rs971681	Savage, 2018
PRKD1	14	insertion	29945914	29946209	295	rs971681	Savage, 2018
PRKD1	14	insertion	30007949	30008279	330	rs971681	Savage, 2018
PRKD1	14	deletion	30030365	-	65	rs971681	Savage, 2018
AKAP6	14	insertion	32453562	32453885	323	rs17522122;rs2239647	David, 2015; Savage, 2018
AKAP6	14	deletion	32492337	-	250	rs17522122;rs2239647	David, 2015; Savage, 2018
AKAP6	14	deletion	32634818	-	55	rs17522122;rs2239647	David, 2015; Savage, 2018
AKAP6	14	insertion	32837948	32838263	315	rs17522122;rs2239647	David, 2015; Savage, 2018
FUT8	14	insertion	65457887	65458201	314	14:66113725_C_A	David, 2016
MARK3	14	insertion	103452475	103452784	309	rs2071407	Savage, 2018
INO80	15	insertion	41031913	41032088	175	rs75322822	Savage, 2018
RTF1	15	deletion	41410166	-	462	rs75322822	Savage, 2018
RTF1	15	deletion	41430384	-	1965	rs75322822	Savage, 2018
RTF1	15	insertion	41470639	41470938	299	rs75322822	Savage, 2018
GLDN	15	deletion	51392722	-	117	rs7172979	Savage, 2018
DMXL2	15	insertion	51556060	51556384	324	rs7172979	Savage, 2018
DMXL2	15	insertion	51583107	51585428	2321	rs7172979	Savage, 2018
TMOD2	15	deletion	51785131	-	278	rs7172979	Savage, 2018
TMOD3	15	insertion	51905756	51905979	223	rs7172979	Savage, 2018
GNB5	15	insertion	52121612	52121903	291	rs7172979	Savage, 2018
DPP8	15	insertion	65479561	65479887	326	rs72739469	Savage, 2018
RAB11A	15	insertion	65843572	65843919	347	rs72739469	Savage, 2018
EFTUD1	15	insertion	82170106	82170425	319	rs8025964	Savage, 2018
CPEB1	15	insertion	82579614	82579954	340	rs8025964	Savage, 2018
CPEB1	15	insertion	82617720	82618012	292	rs8025964	Savage, 2018
NTRK3	15	insertion	87895766	87895857	91	rs1369429	Savage, 2018
NTRK3	15	deletion	87988637	-	949	rs1369429	Savage, 2018
NTRK3	15	insertion	88013024	88013241	217	rs1369429	Savage, 2018
NTRK3	15	insertion	88056876	88057197	321	rs1369429	Savage, 2018
NTRK3	15	insertion	88094168	88094501	333	rs1369429	Savage, 2018
RBFOX1	16	deletion	5460109	-	328	rs11646221	Savage, 2018
RBFOX1	16	deletion	5686660	-	1720	rs11646221	Savage, 2018
RBFOX1	16	insertion	5754377	5755351	974	rs11646221	Savage, 2018
RBFOX1	16	insertion	5814646	5814972	326	rs11646221	Savage, 2018
RBFOX1	16	deletion	5879405	-	132	rs11646221	Savage, 2018
RBFOX1	16	insertion	5897007	5897335	328	rs11646221	Savage, 2018
RBFOX1	16	deletion	6398045	-	501	rs11646221	Savage, 2018
RBFOX1	16	deletion	6417852	-	435	rs11646221	Savage, 2018
RBFOX1	16	insertion	6574425	6574738	313	rs11646221	Savage, 2018
RBFOX1	16	insertion	6779902	6780370	468	rs11646221	Savage, 2018
RBFOX1	16	insertion	6936891	6937127	236	rs11646221	Savage, 2018
RBFOX1	16	insertion	7229784	7230044	260	rs11646221	Savage, 2018
RBFOX1	16	insertion	7612038	7612359	321	rs11646221	Savage, 2018
GRIN2A	16	deletion	9928829	-	488	rs72774059	Savage, 2018
GRIN2A	16	insertion	10039766	10039821	55	rs72774059	Savage, 2018
SNX29	16	insertion	12358350	12358497	147	rs2457192	Savage, 2018
SNX29	16	insertion	12555505	12555896	391	rs2457192	Savage, 2018
SHISA9	16	deletion	12986267	-	2195	rs62029752;rs276626	Savage, 2018
TNRC6A	16	insertion	24625469	24625770	301	rs34172651	Savage, 2018
TNRC6A	16	deletion	24768262	-	2465	rs34172651	Savage, 2018
CDH8	16	deletion	61662604	-	175	rs12446238	Savage, 2018
CDH8	16	insertion	61675195	61675633	438	rs12446238	Savage, 2018
CDH8	16	deletion	61781067	-	734	rs12446238	Savage, 2018
CDH8	16	insertion	61782070	61788108	6038	rs12446238	Savage, 2018
CDH8	16	insertion	61801454	61807534	6080	rs12446238	Savage, 2018
CDH8	16	deletion	61887308	-	4143	rs12446238	Savage, 2018
NFATC3	16	insertion	68112637	68112795	158	rs9888986	Savage, 2018
SLC7A6	16	deletion	68268844	-	1680	rs9888986	Savage, 2018
ZNF19	16	deletion	71512971	-	115	rs310333	Savage, 2018
SKAP1	17	insertion	48198172	48198488	316	rs12928404	Sniekers, 2017
SKAP1	17	deletion	48259161	-	53	rs12928404	Sniekers, 2017
SKAP1	17	deletion	48286479	-	343	rs12928404	Sniekers, 2017
SKAP1	17	deletion	48337422	-	820	rs12928404	Sniekers, 2017
IGF2BP1	17	insertion	49027583	49027901	318	rs11079849	Savage, 2018
HSF5	17	insertion	58449740	58450049	309	rs66954617	Savage, 2018
HSF5	17	insertion	58454091	58454259	168	rs66954617	Savage, 2018
TEX14	17	deletion	58639648	-	2995	rs66954617	Savage, 2018
PPM1E	17	insertion	58762615	58762926	311	rs66954617	Savage, 2018
PPM1E	17	insertion	58775631	58775958	327	rs66954617	Savage, 2018
PPM1E	17	insertion	58836736	58837050	314	rs66954617	Savage, 2018
PPM1E	17	insertion	58883484	58883797	313	rs66954617	Savage, 2018
TRIM37	17	insertion	59032242	59032567	325	rs66954617	Savage, 2018
TRIM37	17	insertion	59040764	59041075	311	rs66954617	Savage, 2018
TRIM37	17	insertion	59051737	59051922	185	rs66954617	Savage, 2018
DCC	18	deletion	52358208	-	566	rs71367283;rs6508220	Savage, 2018
DCC	18	insertion	52792738	52792866	128	rs71367283;rs6508220	Savage, 2018
DCC	18	deletion	52952445	-	84	rs71367283;rs6508220	Savage, 2018
DCC	18	insertion	53023314	53023430	116	rs71367283;rs6508220	Savage, 2018
DCC	18	insertion	53173506	53177349	3843	rs71367283;rs6508220	Savage, 2018
DCC	18	insertion	53439772	53440076	304	rs71367283;rs6508220	Savage, 2018
SH3GL1	19	insertion	4382239	4382558	319	rs76608582	Savage, 2018
MAST3	19	insertion	18139807	18140125	318	rs2072490	Savage, 2018
ZNF584	19	insertion	58404219	58406377	2158	rs73068339	Savage, 2018
ZNF584	19	insertion	58412188	58412511	323	rs73068339	Savage, 2018
SLC27A5	19	deletion	58490956	-	3235	rs73068339	Savage, 2018
SLC27A5	19	deletion	58496757	-	1546	rs73068339	Savage, 2018
PHF20	20	deletion	35797866	-	3808	rs78084033	Savage, 2018
PHF20	20	insertion	35814578	35814900	322	rs78084033	Savage, 2018
PHF20	20	insertion	35926219	35926539	320	rs78084033	Savage, 2018
PHF20	20	deletion	35933284	-	589	rs78084033	Savage, 2018
CNBD2	20	deletion	35970944	-	151	rs78084033	Savage, 2018
CNBD2	20	insertion	36000722	36002454	1732	rs78084033	Savage, 2018
PREX1	20	deletion	48620461	-	5759	rs6019535	Savage, 2018
PREX1	20	deletion	48823404	-	104	rs6019535	Savage, 2018
ARFGEF2	20	insertion	48928204	48928514	310	rs6019535	Savage, 2018
ARFGEF2	20	insertion	48935095	48936529	1434	rs6019535	Savage, 2018
ARFGEF2	20	insertion	49023513	49023849	336	rs6019535	Savage, 2018
STAU1	20	insertion	49175784	49176087	303	rs6019535	Savage, 2018
DDX27	20	deletion	49221110	-	809	rs6019535	Savage, 2018
DDX27	20	insertion	49226860	49227177	317	rs6019535	Savage, 2018
ZNFX1	20	insertion	49274838	49275153	315	rs6019535	Savage, 2018
HMGN1	21	deletion	39349696	-	96	rs2836921	Savage, 2018
OSBP2	22	deletion	30752294	-	1366	rs5753383	Savage, 2018
OSBP2	22	deletion	30766584	-	60	rs5753383	Savage, 2018
OSBP2	22	insertion	30858113	30858446	333	rs5753383	Savage, 2018
CACNA1I	22	deletion	39576573	-	116	rs5750853	Savage, 2018
CACNA1I	22	deletion	39591571	-	582	rs5750853	Savage, 2018
CACNA1I	22	insertion	39599337	39599659	322	rs5750853	Savage, 2018
EP300	22	deletion	41135508	-	2279	rs4821995	Savage, 2018
EP300	22	insertion	41163152	41163467	315	rs4821995	Savage, 2018
EP300	22	insertion	41167564	41167620	56	rs4821995	Savage, 2018
ZC3H7B	22	insertion	41309010	41309314	304	rs4821995	Savage, 2018
ZC3H7B	22	insertion	41321831	41322153	322	rs4821995	Savage, 2018
XRCC6	22	insertion	41630481	41632195	1714	rs4821995	Savage, 2018
SREBF2	22	insertion	41892365	41892676	311	rs2142694;rs62236533	David, 2016; Savage, 2018
WBP2NL	22	deletion	42041626	-	709	rs2142694;rs36093924;rs62236533	David, 2016; Sniekers, 2017; Savage, 2018
NDUFA6	22	deletion	42088125	-	3765	rs2142694;rs36093924;rs62236533	David, 2016; Sniekers, 2017; Savage, 2018
NDUFA6-DT	22	insertion	42113511	42113836	325	rs36093924	Sniekers, 2017
TCF20	22	insertion	42225330	42225652	322	rs2142694;rs36093924;rs62236533	David, 2016; Sniekers, 2017; Savage, 2018
