# Supplementary material for: Identification of genes involved in the evolution of human intelligence through combination of inter-species and intra-species genetic variations
Source: PeerJ. 2020 Apr 16;8:e8912. doi: 10.7717/peerj.8912 (PMC7167246; doi:10.7717/peerj.8912)
Supplement: Table S5 [file peerj-08-8912-s005.xlsx]

## Sheet: Sheet1
Supplementary Table5. inversions in human, chimpanzee or orangutan located in genes associated with intelligence
Gene	Chromosome	Inversion_Start	Inversion_End	Inversion_Size (kbp)	Associated SNP	Reference	Specificity
AFF3	2	99489073	102318442	2829.37	rs71413877;rs13010010	Sniekers, 2017; Savage, 2018	human-chimpanzee
STAG1	3	136435801	136493455	57.65	rs9853960	Savage, 2018	human-chimpanzee
GRID2	4	93441697	93544877	103.18	rs1972860	Savage, 2018	human-chimpanzee
CDH9	5	20937936	29391742	8453.81	rs75973558	Savage, 2018	human-chimpanzee
AUTS2	7	67267977	72546897	5278.92	rs2030705;rs13223152;rs11972637	Savage, 2018	human-chimpanzee
SRPK2	7	105377329	105403332	26	rs12535854	Savage, 2018	human-chimpanzee
PTCH1	9	94107951	97013860	2905.91	rs28620532	Savage, 2018	human-chimpanzee
MACROD1	11	64134853	64181370	46.52	rs7941785	Savage, 2018	human-chimpanzee
CPEB1	15	82320804	85230645	2909.84	rs8025964	Savage, 2018	human-chimpanzee
TNRC6A	16	22758758	28308956	5550.2	rs34172651	Savage, 2018	human-chimpanzee
CLN3	16	28340259	28759374	419.12	rs2008514	Savage, 2018	human-chimpanzee
NPIPB9	16	28770368	30119047	1348.68	rs12928404	Sniekers, 2017	human-chimpanzee
ATXN2L	16	28785856	30209618	1423.76	rs2008514;rs12928404	Sniekers, 2017; Savage, 2018	human-chimpanzee
MTSS1L	16	70044383	74328437	4284.05	rs7196032	Savage, 2018	human-chimpanzee
MAPT	17	45509457	47041691	1532.23	rs17698176	Savage, 2018	human-chimpanzee
CHADL	22	41231347	41298234	66.89	rs4821995;rs62236533	Savage, 2018	human-chimpanzee
COL11A1	1	102837658	102914150	76.49	rs1528204	Savage, 2018	human-orangutan
CACNA2D3	3	55069148	55131684	62.54	rs4485754	Savage, 2018	human-orangutan
DOCK2	5	169971660	170001434	29.77	rs6860963	Savage, 2018	human-orangutan
GRK6	5	176308978	178040801	1731.82	rs2450333	Savage, 2018	human-orangutan
PTCH1	9	93940481	97024153	3083.67	rs28620532	Savage, 2018	human-orangutan
ADAM12	10	126156172	126201422	45.25	rs4962322	Zabaneh, 2018	human-orangutan
MACROD1	11	62714203	65908578	3194.38	rs7941785	Savage, 2018	human-orangutan
SYT1	12	79341581	79418483	76.9	rs6539284	Savage, 2018	human-orangutan
FAM154B	15	82280570	85283696	3003.13	rs8025964	Savage, 2018	human-orangutan
CLN3	16	28328889	29023968	695.08	rs2008514	Savage, 2018	human-orangutan
MTSS1L	16	69937372	74334922	4397.55	rs7196032	Savage, 2018	human-orangutan
ZNHIT3	17	36092619	37894696	1802.08	rs2285640	Savage, 2018	human-orangutan
MAPT	17	45636219	46555184	918.97	rs17698176	Savage, 2018	human-orangutan
PAPL	19	37790476	40307022	2516.55	rs144026674	Savage, 2018	human-orangutan
CSE1L	20	49076063	49137697	61.63	rs6019535;rs113315451	Sniekers, 2017; Savage, 2018	human-orangutan
